# Supplementary material for: Science, healthcare system, and government effectiveness perception and COVID-19 vaccination acceptance and hesitancy in a global sample: an analytical cross-sectional analysis
Source: PubMed Central journal article supplement — BMJ Open. 2021 Nov 23;11(11):e049716. doi: 10.1136/bmjopen-2021-049716 (PMC8611238; doi:10.1136/bmjopen-2021-049716), 2021-11-23
Supplement: bmjopen-2021-049716supp003.pdf [file bmjopen-2021-049716supp003.pdf]

*Confidential*

Page 1

## Enquête mondiale sur le coronavirus

Bienvenue ! Vous êtes invité(e) à participer à une enquête épidémiologique mondiale de l'Université de Rochester afin de nous aider à mieux comprendre les attitudes, convictions et connaissances relatives à des questions actuelles de santé publique, comme le coronavirus, le COVID-19 et d'autres maladies infectieuses, ainsi que les facteurs susceptibles d'y être liés. Si vous êtes âgé(e) d'au moins 18 ans et pouvez répondre à l'enquête en français, veuillez le faire ci-dessous !

---

LANGUAGE

---

Confidential

Page 2

## SCHOOL OF MEDICINE AND DENTISTRY

Department of Obstetrics &amp; Gynecology

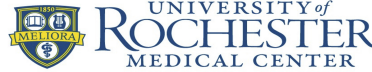**Enquête mondiale sur le coronavirus : Opinions et pratiques****Enquêteurs principaux : Timothy Dye, PhD et Eva Pressman, MD**

Ce formulaire contient une étude conduite par une faculté de l'École de médecine et de dentisterie de l'Université de Rochester.

L'objectif de cette étude est de mieux comprendre les attitudes, convictions et connaissances relatives à des questions actuelles de santé publique, comme le coronavirus et d'autres maladies infectieuses, ainsi que les facteurs susceptibles d'y être liés. L'étude contient des questions relatives à vos idées et expériences en matière de coronavirus et de COVID-19, de santé physique et mentale, de stress et de soutien social, ainsi que des questions à caractère démographique. Vous pouvez passer n'importe quelle question.

Si vous décidez de participer à cette étude, il vous sera demandé de répondre à un questionnaire par le biais d'un lien disponible sur Internet. Il vous faudra entre 20 et 40 minutes pour compléter l'enquête. Nous estimons que 7 000 personnes environ participeront à cette étude.

Les risques liés à cette participation sont minimes. Certaines questions peuvent être troublantes ou embarrassantes. Vous pouvez passer les questions auxquelles vous ne voulez pas répondre. Afin de protéger la confidentialité des données, celles-ci seront transmises dans un format crypté (que seul le personnel autorisé pourra lire). Aucun bénéfice n'est escompté.

Vous ne recevrez aucune compensation pour votre participation à cette enquête.

L'Université de Rochester mettra tout en œuvre pour préserver la confidentialité de vos informations. Les résultats de la recherche pourront être présentés lors de réunions ou dans des publications, mais ne permettront pas l'identification des personnes qui y auront répondu.

**Votre participation à cette étude se fait sur base totalement volontaire.** Vous n'êtes pas tenu(e) d'y participer et pouvez interrompre le questionnaire à tout moment. Si vous décidez de l'interrompre, nous ne pourrions pas supprimer vos informations, car nous ne collectons aucune donnée d'identification et ne pourrions pas retrouver et supprimer vos réponses.

L'Université de Rochester reçoit un paiement de la Fondation Mae Stone Goode pour la réalisation de cette étude de recherche.

Si vous avez des questions concernant cette recherche, n'hésitez pas à prendre contact avec le Dr Timothy Dye par e-mail à [tim\\_dye@urmc.rochester.edu](mailto:tim_dye@urmc.rochester.edu).

N'hésitez pas à prendre contact avec le Comité de révision des sujets de recherche (Research Subjects Review Board) de l'Université de Rochester au 265 Crittenden Blvd., CU 420315, Rochester, NY 14642, téléphone +1 (585) 276-0005 ou +1 (877) 449-4441 dans les cas suivants :

- Vous désirez parler à une personne qui ne fait pas partie du personnel de recherche de vos droits en tant que sujet de recherche ;
- Vous désirez faire part de vos inquiétudes au sujet de la recherche.

RSRB STUDY00004825  
Version Date: April 28, 2020

RSRB Approval Date: 4/28/2020

*Confidential*

Page 3

Enque

te mondiale sur le coronavirus : Opinions et pratiques

Enque

teurs principaux : Timothy Dye, PhD et Eva Pressman, MD

Ce formulaire contient une

e

tude conduite par une  
faculte

de

l'E

cole de  
me

decine et de dentisterie de

l'Universite

de Rochester.

L'objectif de cette

e

tude est de mieux comprendre les attitudes, convictions et connaissances relatives

a

des questions actuelles de  
sante

publique, comme le coronavirus et d'autres maladies infectieuses, ainsi que les facteurs susceptibles d'y

e

tre  
lie

s.

L'e

tude contient des questions relatives

a

vos  
idees et  
experiences en  
matiere de coronavirus et de COVID-19, de  
sante

physique et mentale, de stress et de soutien social, ainsi que des questions

a

caracte

re

de

mographique. Vous pouvez passer n'importe quelle question.

12/04/2020 9:12am

projectredcap.org

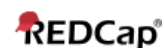

Si vous  
de  
cidez de participer  
a  
cette  
e  
tude, il vous sera  
demande  
de  
re  
pondre  
a  
un questionnaire par le biais d'un lien disponible sur Internet. Il vous faudra entre 15 et 25 minutes pour  
comple  
ter  
l'enque  
te. Nous estimons que 7 000 personnes environ participeront  
a  
cette  
e  
tude.

Les risques  
lie  
s  
a  
cette participation sont minimes. Certaines questions peuvent  
e  
tre troublantes ou embarrassantes. Vous pouvez passer les questions auxquelles vous ne voulez pas  
re  
pondre. Afin de  
prote  
ger la  
confidentialite  
des  
donne  
es, celles-ci seront transmises dans un format  
crypte  
(que seul le personnel  
autorite  
pourra lire). Aucun  
be  
ne  
fice n'est  
escompte  
.

Vous ne recevrez aucune compensation pour votre participation  
a

^  
,  
cette  
enque  
te.  
L'Universite  
de Rochester mettra tout en œuvre pour  
pre  
server la  
confidentialite  
de vos informations. Les  
re  
sultats de la recherche pourront  
e  
tre  
pre  
sente  
s lors de  
re  
unions ou dans des publications, mais ne permettront pas l'identification des personnes qui y auront  
re  
pondu.  
Votre participation  
a  
cette  
e  
tude se fait sur base totalement volontaire. Vous  
n'e  
tes pas tenu(e) d'y participer et pouvez interrompre le questionnaire  
a  
tout moment. Si vous  
de  
cidez de l'interrompre, nous ne pourrions pas supprimer vos informations, car nous ne collectons aucune  
donne  
e d'identification et ne pourrions pas retrouver et supprimer vos  
re  
ponses.  
L'Universite  
de Rochester  
rec  
oit un paiement de la Fondation Mae Stone Goode pour la  
re  
alisation de cette  
e  
tude de recherche.  
Si vous avez des questions concernant cette recherche,  
n'he

,  
sitez pas  
a

,  
prenez contact avec le Dr Timothy Dye par e-mail  
a

,  
tim\_dye@urmc.rochester.edu.

,  
N'he

,  
sitez pas  
a

,  
prenez contact avec le  
Comite

,  
de  
re

,  
vision des sujets de recherche (Research Subjects Review Board) de  
l'Universite

,  
de Rochester au 265 Crittenden Blvd., CU 420315, Rochester, NY 14642,  
te

,  
le

,  
phone +1 (585) 276-0005 ou +1 (877) 449-4441 dans les cas suivants :

,  
• Vous  
de

,  
sirez parler  
a

,  
une personne qui ne fait pas partie du personnel de recherche de vos droits en tant que sujet de recherche ;

,  
• Vous  
de

,  
sirez faire part de vos  
inqui

,  
tudes au sujet de la recherche.

---

Voulez-vous poursuivre le questionnaire ?

Oui  
 No

Confidential

Page 7

**Section 1 : Questions relatives au pays**

Confidential

Page 8

1. Dans quel pays vivez-vous ?

- Afghanistan
- Afrique du Sud
- Albanie
- Algérie
- Allemagne
- Andorre
- Angola
- Anguilla
- Antarctique [a]
- Antigua-et-Barbuda
- Arabie saoudite
- Argentin
- Arménie
- Aruba
- Australie [b]
- Autriche
- Azerbaïdjan
- Bahamas (la)
- Bahrain
- Bangladesh
- Barbade
- Belgique
- Belize
- Bénin
- Bhutan
- Biélorussie
- Bolivie (État plurinational de)
- Bonaire
- Bosnie-herzégovine
- Botswana
- Brésil
- Brunéi Darussalam [e]
- Bulgarie
- Burkina faso
- Burundi
- Cambodge
- Cameroun
- Canada
- Cap-Vert [f]
- Chili
- Chine
- Chypre
- Colombie
- Comores (las)
- Congo (le) [g]
- Congo (République démocratique du)
- Corée (République de) [p]
- Corée (République populaire démocratique de) [o]
- Costa rica
- Côte d'Ivoire [h]
- Croatie
- Cuba
- Curaçao
- Danemark
- Djibouti
- Dominica
- Egypte
- El salvador
- Emirats Arabes Unis (el)
- Equateur
- Érythrée
- Espagne
- Estonie
- Eswatini [j]
- États-Unis d'Amérique (les)
- Ethiopie
- Fédération de Russie (la) [v]
- Fidji
- Finlande

12/04/2020 9:12am

projectredcap.org

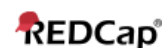



- France [l]
- Gabon
- Gambie
- Géorgie
- Géorgie du Sud et îles Sandwich du Sud
- Ghana
- Gibraltar
- Grèce
- Grenade
- Groenland
- Guadelupe
- Guam
- Guatemala
- Guernsey
- Guinée
- Guinée équatoriale
- Guinée-bissau
- Guyane française
- Guyanes
- Honduras
- Hong kong
- Hongrie
- île bouvet
- île d'ascencion
- île de Man
- île de Noël
- île norfolk
- îles caïmans
- îles Cocos (Keeling) (les)
- îles cook
- îles d'aland
- îles des Bermudes
- îles Falkland (les) [Malouines] [k]
- îles féroé
- îles Heard et mcdonald
- îles Mariannes du Nord
- îles marshall
- îles Mineures Éloignées des États-Unis (les) [ac]
- îles salomon
- îles Turques et Caïques (la)
- îles Vierges (États-Unis,) [ag]
- îles Vierges britanniques [af]
- Inde
- Indonésie
- Irak
- Iran (République islamique d ')
- Irlande
- Islande
- Israël
- Italie
- Jamaïque
- Jan mayen
- Japon
- Jersey
- Jordanie
- Kazakhstan
- Kenya
- Kiribati
- Koweït
- Kyrgyzstan
- Lesotho
- Lettonie
- Liban
- Libéria
- Libye
- Liechtenstein
- Lituanie
- Luxembourg
- Macao [r]
- Macédoine du Nord [s]

- Madagascar
- Malaisie
- Malawien
- Maldives
- Mali
- Malte
- Maroc
- Martinique
- Mauricio
- Mauritanie
- Mayotte
- Mexique
- Micronésie (États fédérés de)
- Moldova (République de)
- Monaco
- Mongolie
- Monténégro
- Montserrat
- Mozambique
- Myanmar [t]
- Namibie
- Nauru
- Népal
- Nicaragua
- Niger (la)
- Nigeria
- Niue
- Norvège
- Nouvelle calédonie
- Nouvelle-zélande
- Oman
- Ouganda
- Ouzbékistan
- Pakistan
- Palau
- Palestine, État de
- Panama
- Papouasie-nouvelle-guinée
- Paraguay
- Pays-Bas (la)
- Pérou
- Philippines
- Pitcairn [u]
- Pologne
- Polynésie française
- Portugal
- Puerto rico
- Qatar
- République arabe syrienne (la) [x]
- République centrafricaine
- République démocratique populaire lao (la) [q]
- République dominicaine
- République tchèque [i]
- Réunion
- Roumanie
- Royaume-Uni de Grande-Bretagne et d'Irlande du Nord (il)
- Rwanda
- Saba
- Sahara occidental [ah]
- Saint Martin (partie française)
- Saint Pierre et Miquelon
- Saint Vincent et les Grenadines
- Saint-barthélemy
- Saint-Kitts-et-Nevis
- Saint-marin
- Saint-Siège (le) [n]
- Sainte-hélène
- Sainte-lucie
- Samoa
- Samoa américaines

- Sant'Eustachio
- Sao Tomé et Príncipe
- Sénégal
- Serbie
- Seychelles
- Sierra leone
- Singapour
- Sint Maarten (partie néerlandaise)
- Slovaquie
- Slovénie
- Somalie
- Soudan
- Soudan du Sud
- Sri lanka
- Suède
- Suisse
- Suriname
- Svalbard
- Taïwan (Province de Chine) [e]
- Tajikistan
- Tanzanie, République-Unie de
- Tchad
- Territoire britannique de l'océan Indien (el)
- Territoires français du Sud (les) [m]
- Thaïlande
- Timor oriental [aa]
- Togo
- Tokelau
- Tonga
- Trinidad et Tobago
- Tristan da Cunha
- Tunisie
- Turkménistan
- Turquie
- Tuvalu
- Ukraine
- Uruguay
- Vanuatu
- Venezuela (République bolivarienne du)
- Vietnam [ae]
- Wallis et Futuna
- Yémen
- Zambie
- Zimbabwe
- Un autre

---

Si vous vivez dans un autre pays, veuillez préciser

---

*Confidential*

Page 12

1b. Pour les résidents des États-Unis, dans quel État vivez-vous ?

- New York
- Alabama
- Alaska
- Arizona
- Arkansas
- California
- Colorado
- Connecticut
- Delaware
- Florida
- Georgia
- Hawaii
- Idaho
- Illinois
- Indiana
- Iowa
- Kansas
- Kentucky
- Louisiana
- Maine
- Maryland
- Massachusetts
- Michigan
- Minnesota
- Mississippi
- Missouri
- Montana
- Nebraska
- Nevada
- New Hampshire
- New Jersey
- New Mexico
- North Carolina
- North Dakota
- Ohio
- Oklahoma
- Oregon
- Pennsylvania
- Rhode Island
- South Carolina
- South Dakota
- Tennessee
- Texas
- Utah
- Vermont
- Virginia
- Washington
- West Virginia
- Wisconsin
- Wyoming

## Confidential

Page 13

1c. Pour les résidents de l'Inde, dans quel État vivez-vous ?

- IN-AP = Andhra Pradesh
- IN-AR = Arunachal Pradesh
- IN-AS = Assam
- IN-BR = Bihar
- IN-CT = Chhattisgarh
- IN-GA = Goa
- IN-GJ = Gujarat
- IN-HR = Haryana
- IN-HP = Himachal Pradesh
- IN-JH = Jharkhand
- IN-KA = Karnataka
- IN-KL = Kerala
- IN-MP = Madhya Pradesh
- IN-MH = Maharashtra
- IN-MN = Manipur
- IN-ML = Meghalaya
- IN-MZ = Mizoram
- IN-NL = Nagaland
- IN-OR = Odisha
- IN-PB = Punjab
- IN-RJ = Rajasthan
- IN-SK = Sikkim
- IN-TN = Tamil Nadu
- IN-TG = Telangana
- IN-TR = Tripura
- IN-UT = Uttarakhand
- IN-UP = Uttar Pradesh
- IN-WB = West Bengal
- IN-AN = Andaman and Nicobar Islands
- IN-CH = Chandigarh
- IN-DN = Dadra and Nagar Haveli
- IN-DD = Daman and Diu
- IN-DL = Delhi
- IN-JK = Jammu and Kashmir
- IN-LA = Ladakh
- IN-LD = Lakshadweep
- IN-PY = Puducherry

Confidential

Page 14

2. Quel est votre pays de naissance ?

- Afghanistan
- Afrique du Sud
- Albanie
- Algérie
- Allemagne
- Andorre
- Angola
- Anguilla
- Antarctique [a]
- Antigua-et-Barbuda
- Arabie saoudite
- Argentin
- Arménie
- Aruba
- Australie [b]
- Autriche
- Azerbaïdjan
- Bahamas (la)
- Bahrain
- Bangladesh
- Barbade
- Belgique
- Belize
- Bénin
- Bhutan
- Biélorussie
- Bolivie (État plurinational de)
- Bonaire
- Bosnie-herzégovine
- Botswana
- Brésil
- Brunéi Darussalam [e]
- Bulgarie
- Burkina faso
- Burundi
- Cambodge
- Cameroun
- Canada
- Cap-Vert [f]
- Chili
- Chine
- Chypre
- Colombie
- Comores (las)
- Congo (le) [g]
- Congo (République démocratique du)
- Corée (République de) [p]
- Corée (République populaire démocratique de) [o]
- Costa rica
- Côte d'Ivoire [h]
- Croatie
- Cuba
- Curaçao
- Danemark
- Djibouti
- Dominica
- Egypte
- El salvador
- Emirats Arabes Unis (el)
- Equateur
- Érythrée
- Espagne
- Estonie
- Eswatini [j]
- États-Unis d'Amérique (les)
- Ethiopie
- Fédération de Russie (la) [v]
- Fidji
- Finlande

12/04/2020 9:12am

projectredcap.org

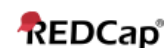

- France [l]
- Gabon
- Gambie
- Géorgie
- Géorgie du Sud et îles Sandwich du Sud
- Ghana
- Gibraltar
- Grèce
- Grenade
- Groenland
- Guadalupe
- Guam
- Guatemala
- Guernsey
- Guinée
- Guinée équatoriale
- Guinée-bissau
- Guyane française
- Guyanes
- Honduras
- Hong kong
- Hongrie
- Île bouvet
- Île d'ascencion
- Île de Man
- Île de Noël
- Île norfolk
- Îles caïmans
- Îles Cocos (Keeling) (les)
- Îles cook
- Îles d'aland
- Îles des Bermudes
- Îles Falkland (les) [Malouines] [k]
- Îles féroé
- Îles Heard et mcdonald
- Îles Mariannes du Nord
- Îles marshall
- Îles Mineures Éloignées des États-Unis (les) [ac]
- Îles salomon
- Îles Turques et Caïques (la)
- Îles Vierges (États-Unis,) [ag]
- Îles Vierges britanniques [af]
- Inde
- Indonésie
- Irak
- Iran (République islamique d ')
- Irlande
- Islande
- Israël
- Italie
- Jamaïque
- Jan mayen
- Japon
- Jersey
- Jordanie
- Kazakhstan
- Kenya
- Kiribati
- Koweït
- Kirgyzstan
- Lesotho
- Lettonie
- Liban
- Libéria
- Libye
- Liechtenstein
- Lituanie
- Luxembourg
- Macao [r]
- Macédoine du Nord [s]

- Madagascar
- Malaisie
- Malawien
- Maldives
- Mali
- Malte
- Maroc
- Martinique
- Mauricio
- Mauritanie
- Mayotte
- Mexique
- Micronésie (États fédérés de)
- Moldova (République de)
- Monaco
- Mongolie
- Monténégro
- Montserrat
- Mozambique
- Myanmar [t]
- Namibie
- Nauru
- Népal
- Nicaragua
- Niger (la)
- Nigeria
- Niue
- Norvège
- Nouvelle calédonie
- Nouvelle-zélande
- Oman
- Ouganda
- Ouzbékistan
- Pakistan
- Palau
- Palestine, État de
- Panama
- Papouasie-nouvelle-guinée
- Paraguay
- Pays-Bas (la)
- Pérou
- Philippines
- Pitcairn [u]
- Pologne
- Polynésie française
- Portugal
- Puerto rico
- Qatar
- République arabe syrienne (la) [x]
- République centrafricaine
- République démocratique populaire lao (la) [q]
- République dominicaine
- République tchèque [i]
- Réunion
- Roumanie
- Royaume-Uni de Grande-Bretagne et d'Irlande du Nord (il)
- Rwanda
- Saba
- Sahara occidental [ah]
- Saint Martin (partie française)
- Saint Pierre et Miquelon
- Saint Vincent et les Grenadines
- Saint-barthélemy
- Saint-Kitts-et-Nevis
- Saint-marin
- Saint-Siège (le) [n]
- Sainte-hélène
- Sainte-lucie
- Samoa
- Samoa américaines



- Sant'Eustachio
- Sao Tomé et Principe
- Sénégal
- Serbie
- Seychelles
- Sierra leone
- Singapour
- Sint Maarten (partie néerlandaise)
- Slovaquie
- Slovénie
- Somalie
- Soudan
- Soudan du Sud
- Sri lanka
- Suède
- Suisse
- Suriname
- Svalbard
- Taïwan (Province de Chine) [e]
- Tajikistan
- Tanzanie, République-Unie de
- Tchad
- Territoire britannique de l'océan Indien (el)
- Territoires français du Sud (les) [m]
- Thaïlande
- Timor oriental [aa]
- Togo
- Tokelau
- Tonga
- Trinidad et Tobago
- Tristan da Cunha
- Tunisie
- Turkménistan
- Turquie
- Tuvalu
- Ukraine
- Uruguay
- Vanuatu
- Venezuela (République bolivarienne du)
- Vietnam [ae]
- Wallis et Futuna
- Yémen
- Zambie
- Zimbabwe
- Un autre

---

Si vous êtes né(e) dans un autre pays, veuillez préciser :

---

Confidential

Page 18

**Section 2 : Comportements en matière de santé**

**Chaque point ci-dessous est une affirmation concernant votre santé avec laquelle vous pouvez être d'accord ou pas d'accord. Cette section sert à évaluer vos croyances personnelles ; il n'y a pas de bonnes ou de mauvaises réponses. Veuillez nous dire dans quelle mesure vous êtes d'accord ou pas d'accord avec chaque affirmation.**

|                                                                                             | Pas du tout d'accord  | Pas d'accord          | Ni d'accord, ni pas d'accord | D'accord              | Tout à fait d'accord  |
|---------------------------------------------------------------------------------------------|-----------------------|-----------------------|------------------------------|-----------------------|-----------------------|
| 1. Si je suis malade, mon propre comportement détermine la rapidité de mon rétablissement.  | <input type="radio"/> | <input type="radio"/> | <input type="radio"/>        | <input type="radio"/> | <input type="radio"/> |
| 2. Quoi que je fasse, si je dois tomber malade, je tomberai malade.                         | <input type="radio"/> | <input type="radio"/> | <input type="radio"/>        | <input type="radio"/> | <input type="radio"/> |
| 3. Être en contact régulier avec mon médecin est le meilleur moyen de ne pas tomber malade. | <input type="radio"/> | <input type="radio"/> | <input type="radio"/>        | <input type="radio"/> | <input type="radio"/> |
| 4. La plupart des éléments qui ont une influence sur ma santé se produisent par hasard.     | <input type="radio"/> | <input type="radio"/> | <input type="radio"/>        | <input type="radio"/> | <input type="radio"/> |
| 5. Lorsque je ne me sens pas bien, je dois consulter un professionnel de la santé qualifié. | <input type="radio"/> | <input type="radio"/> | <input type="radio"/>        | <input type="radio"/> | <input type="radio"/> |
| 6. Je contrôle ma santé.                                                                    | <input type="radio"/> | <input type="radio"/> | <input type="radio"/>        | <input type="radio"/> | <input type="radio"/> |
| 7. Ma famille exerce une forte influence sur mon état de santé.                             | <input type="radio"/> | <input type="radio"/> | <input type="radio"/>        | <input type="radio"/> | <input type="radio"/> |
| 8. Lorsque je tombe malade, c'est de ma faute.                                              | <input type="radio"/> | <input type="radio"/> | <input type="radio"/>        | <input type="radio"/> | <input type="radio"/> |
| 9. La chance joue un grand rôle dans la vitesse à laquelle je me rétablis.                  | <input type="radio"/> | <input type="radio"/> | <input type="radio"/>        | <input type="radio"/> | <input type="radio"/> |
| 10. Les professionnels de la santé contrôlent mon état de santé.                            | <input type="radio"/> | <input type="radio"/> | <input type="radio"/>        | <input type="radio"/> | <input type="radio"/> |
| 11. Si je suis en bonne santé, c'est surtout une question de chance.                        | <input type="radio"/> | <input type="radio"/> | <input type="radio"/>        | <input type="radio"/> | <input type="radio"/> |
| 12. Le facteur qui a le plus d'influence sur ma santé est ce que je fais.                   | <input type="radio"/> | <input type="radio"/> | <input type="radio"/>        | <input type="radio"/> | <input type="radio"/> |

*Confidential*

Page 19

- |                                                                                                                                                                                                     |                       |                       |                       |                       |                       |
|-----------------------------------------------------------------------------------------------------------------------------------------------------------------------------------------------------|-----------------------|-----------------------|-----------------------|-----------------------|-----------------------|
| 13. Si je prends soin de moi, je peux éviter de tomber malade.                                                                                                                                      | <input type="radio"/> |
| 14. Lorsque je me rétablis après avoir été malade, c'est principalement parce que d'autres personnes (par exemple, les médecins, les infirmiers, ma famille ou mes amis) ont bien pris soin de moi. | <input type="radio"/> |
| 15. Quoique que je fasse, je suis susceptible de tomber malade.                                                                                                                                     | <input type="radio"/> |
| 16. S'il doit en être ainsi, je resterai en bonne santé.                                                                                                                                            | <input type="radio"/> |
| 17. Si je prends les mesures adéquates, je peux rester en bonne santé.                                                                                                                              | <input type="radio"/> |
| 18. En ce qui concerne ma santé, je ne peux faire que ce que mon médecin me dit de faire.                                                                                                           | <input type="radio"/> |

Confidential

Page 20

**Section 3 - Croyances relatives au coronavirus****1. Selon vous, les experts de la santé publique ont-ils recommandé ces mesures pour ralentir la propagation du coronavirus ?**

|                                                                    | Oui, recommandé       | Non, pas recommandé   | Je ne sais pas        |
|--------------------------------------------------------------------|-----------------------|-----------------------|-----------------------|
| a. Se laver fréquemment les mains                                  | <input type="radio"/> | <input type="radio"/> | <input type="radio"/> |
| b. Faire bouillir l'eau avant de la boire                          | <input type="radio"/> | <input type="radio"/> | <input type="radio"/> |
| c. Faire porter des masques aux personnes en bonne santé en public | <input type="radio"/> | <input type="radio"/> | <input type="radio"/> |
| d. Éviter les grands rassemblements de personnes                   | <input type="radio"/> | <input type="radio"/> | <input type="radio"/> |
| e. Utiliser de l'antimoustique                                     | <input type="radio"/> | <input type="radio"/> | <input type="radio"/> |
| f. Rester chez soi si l'on se sent malade                          | <input type="radio"/> | <input type="radio"/> | <input type="radio"/> |

g. Autres recommandations

Confidential

Page 21

**2. Selon vous, le coronavirus se transmet-il ou se propage-t-il par les moyens suivants ?**

|                                                                                                     | Oui, transmis par ce moyen | Non, pas transmis par ce moyen | Je ne sais pas        |
|-----------------------------------------------------------------------------------------------------|----------------------------|--------------------------------|-----------------------|
| a. Être en contact rapproché avec une personne infectée                                             | <input type="radio"/>      | <input type="radio"/>          | <input type="radio"/> |
| b. Toucher des surfaces contenant de petites quantités de fluides corporels d'une personne infectée | <input type="radio"/>      | <input type="radio"/>          | <input type="radio"/> |
| c. Se faire piquer par un moustique                                                                 | <input type="radio"/>      | <input type="radio"/>          | <input type="radio"/> |
| d. Par voie génétique                                                                               | <input type="radio"/>      | <input type="radio"/>          | <input type="radio"/> |

e. Par quelles autres voies le coronavirus se transmet-il ou se propage-t-il ? Veuillez expliquer.

---

Confidential

Page 22

**3. Veuillez nous dire si vous pensez que les éléments suivants sont des symptômes courants d'une infection au coronavirus (COVID-19)**

|                                    | Oui, c'est un symptôme | Non, ce n'est pas un symptôme | Je ne sais pas        |
|------------------------------------|------------------------|-------------------------------|-----------------------|
| a. Fièvre                          | <input type="radio"/>  | <input type="radio"/>         | <input type="radio"/> |
| b. Toux sèche                      | <input type="radio"/>  | <input type="radio"/>         | <input type="radio"/> |
| c. Vomissements                    | <input type="radio"/>  | <input type="radio"/>         | <input type="radio"/> |
| d. Congestion nasale/nez qui coule | <input type="radio"/>  | <input type="radio"/>         | <input type="radio"/> |
| e. Éruptions cutanées              | <input type="radio"/>  | <input type="radio"/>         | <input type="radio"/> |

f. Autres symptômes (Veuillez préciser :)

Confidential

Page 23

#### 4. Pensez-vous que les groupes ci-dessous risquent davantage de développer de graves complications médicales une fois infectés par le coronavirus ?

|                                                         | Oui, plus de risques  | Non, pas plus de risques | Je ne sais pas        |
|---------------------------------------------------------|-----------------------|--------------------------|-----------------------|
| a. Enfants                                              | <input type="radio"/> | <input type="radio"/>    | <input type="radio"/> |
| b. Femmes enceintes                                     | <input type="radio"/> | <input type="radio"/>    | <input type="radio"/> |
| c. Personnes atteintes de problèmes médicaux chroniques | <input type="radio"/> | <input type="radio"/>    | <input type="radio"/> |
| d. Personnes âgées d'une vingtaine d'années             | <input type="radio"/> | <input type="radio"/>    | <input type="radio"/> |
| e. Personnes obèses                                     | <input type="radio"/> | <input type="radio"/>    | <input type="radio"/> |
| f. Personnes de plus de 60 ans                          | <input type="radio"/> | <input type="radio"/>    | <input type="radio"/> |

5. Selon vous, existe-t-il un vaccin pour protéger les personnes du coronavirus actuel, également connu sous le nom de COVID-19 ?  Oui  Non  Je ne sais pas

6. Selon vous, le vaccin contre la grippe protège-t-il les personnes du coronavirus actuel, également connu sous le nom de COVID-19 ?  Oui  Non  Je ne sais pas

7. Selon vous, si une personne pense présenter les symptômes du coronavirus, que doit-elle faire ?  Rester chez elle et appeler un médecin  Se rendre immédiatement dans un service des urgences  Autre chose  Je ne sais pas

7a. Autre chose, veuillez expliquer

---

*Confidential*

Page 24

**Section 4 - Inquiétudes et expériences en matière de santé**

1. Pensez-vous disposer de suffisamment d'informations sur les moyens de vous protéger et de protéger votre famille du coronavirus ?  Oui  Non  Je ne sais pas

2. Le cas échéant, que faites-vous pour vous protéger et protéger votre famille du coronavirus ?

3. Pensez-vous que les inquiétudes et le stress liés au coronavirus ont une influence négative sur votre santé mentale ?  Oui, une influence majeure  Oui, une influence mineure  Non  Je ne sais pas

3b. Veuillez expliquer :



Confidential

Page 25

**q4. Dans quelle mesure estimez-vous que chacun des groupes suivants se montre efficace dans la lutte contre le coronavirus et le COVID-19 ?**

- a. Le système des soins de santé (y compris les hôpitaux, cliniques, médecins, infirmiers et autres prestataires de soins de santé)
- Pas du tout efficace  
 Pas très efficace  
 Assez efficace  
 Très efficace

a. Veuillez expliquer :

---

- b. Le monde de la science (y compris les chercheurs et analystes)
- Pas du tout efficace  
 Pas très efficace  
 Assez efficace  
 Très efficace

b. Veuillez expliquer :

---

- c. Le gouvernement (y compris les gouvernements locaux et nationaux)
- Pas du tout efficace  
 Pas très efficace  
 Assez efficace  
 Très efficace

c. Veuillez expliquer :

---

- d. Le système éducatif (y compris les écoles primaires et secondaires, et les universités)
- Pas du tout efficace  
 Pas très efficace  
 Assez efficace  
 Très efficace

d. Veuillez expliquer :

---

- e. Les commerces et services locaux (y compris les boutiques, supermarchés et restaurants)
- Pas du tout efficace  
 Pas très efficace  
 Assez efficace  
 Très efficace

e. Veuillez expliquer :

---

- f. L'industrie (y compris les grands employeurs, les usines et les fabricants)
- Pas du tout efficace  
 Pas très efficace  
 Assez efficace  
 Très efficace

f. Veuillez expliquer :

---

*Confidential*

Page 26

---

g. La presse (y compris les journalistes, les journaux, la télévision et les médias visuels)

- Pas du tout efficace  
 Pas très efficace  
 Assez efficace  
 Très efficace

---

g. Veuillez expliquer :

---

---

h. Les réseaux sociaux

- Pas du tout efficace  
 Pas très efficace  
 Assez efficace  
 Très efficace

---

h. Veuillez expliquer :

---

Confidential

Page 27

**5. Dans quelle mesure les éléments suivants vous inquiètent-ils ?**

|                                                                                                                                                       | Très inquiétants      | Plutôt inquiétants    | Pas très inquiétants  | Pas du tout inquiétants | Je ne sais pas        |
|-------------------------------------------------------------------------------------------------------------------------------------------------------|-----------------------|-----------------------|-----------------------|-------------------------|-----------------------|
| a. Vous ou un membre de votre famille contractez le coronavirus                                                                                       | <input type="radio"/> | <input type="radio"/> | <input type="radio"/> | <input type="radio"/>   | <input type="radio"/> |
| b. Vous perdez des revenus en raison de la fermeture de votre lieu de travail ou d'une réduction de vos heures de travail en lien avec le coronavirus | <input type="radio"/> | <input type="radio"/> | <input type="radio"/> | <input type="radio"/>   | <input type="radio"/> |
| c. Vous contractez la maladie de Lyme                                                                                                                 | <input type="radio"/> | <input type="radio"/> | <input type="radio"/> | <input type="radio"/>   | <input type="radio"/> |
| d. Le coronavirus a des répercussions négatives sur vos investissements, notamment votre épargne-pension ou épargne-études                            | <input type="radio"/> | <input type="radio"/> | <input type="radio"/> | <input type="radio"/>   | <input type="radio"/> |
| e. Vous contractez la dengue                                                                                                                          | <input type="radio"/> | <input type="radio"/> | <input type="radio"/> | <input type="radio"/>   | <input type="radio"/> |
| f. Vous vous exposez au coronavirus, car vous ne pouvez pas vous permettre de rester chez vous et de vous absenter du travail                         | <input type="radio"/> | <input type="radio"/> | <input type="radio"/> | <input type="radio"/>   | <input type="radio"/> |
| g. Vous ne pouvez pas financièrement vous permettre de vous faire dépister ou traiter en cas de besoin                                                | <input type="radio"/> | <input type="radio"/> | <input type="radio"/> | <input type="radio"/>   | <input type="radio"/> |

h. Autre inquiétude, veuillez expliquer

5b. Dans quelle mesure votre vie a-t-elle été perturbée par l'épidémie de coronavirus ?

- Complètement  
 Beaucoup  
 Juste un peu  
 Pas du tout  
 Je ne sais pas

5b. Veuillez expliquer dans quelle mesure votre vie a été perturbée par l'épidémie de coronavirus.

Confidential

Page 28

**6. Avez-vous adopté les mesures suivantes en raison de la récente épidémie de coronavirus ?**

|                                                                                                            | Oui                   | Non                   | Je ne sais pas        |
|------------------------------------------------------------------------------------------------------------|-----------------------|-----------------------|-----------------------|
| a. Décider de ne pas voyager ou changer les projets de voyage                                              | <input type="radio"/> | <input type="radio"/> | <input type="radio"/> |
| b. Acheter ou porter un masque de protection                                                               | <input type="radio"/> | <input type="radio"/> | <input type="radio"/> |
| c. Faire des provisions d'articles tels que de la nourriture ou des produits ménagers                      | <input type="radio"/> | <input type="radio"/> | <input type="radio"/> |
| d. Reporter ou annuler des rendez-vous médicaux                                                            | <input type="radio"/> | <input type="radio"/> | <input type="radio"/> |
| e. Faire des réserves de médicaments sur ordonnance                                                        | <input type="radio"/> | <input type="radio"/> | <input type="radio"/> |
| f. Rester chez vous au lieu de vous rendre à l'école, au travail ou à d'autres activités habituelles       | <input type="radio"/> | <input type="radio"/> | <input type="radio"/> |
| g. Reporter ou annuler une procédure médicale ou chirurgicale                                              | <input type="radio"/> | <input type="radio"/> | <input type="radio"/> |
| h. Annuler votre participation à de grands rassemblements tels que des concerts ou des événements sportifs | <input type="radio"/> | <input type="radio"/> | <input type="radio"/> |
| i. Démissionner                                                                                            | <input type="radio"/> | <input type="radio"/> | <input type="radio"/> |

6b. N'hésitez pas à nous faire part d'explications ou de détails au sujet des éléments ci-dessus :

---

Confidential

Page 29

**7. Avez-vous rencontré les situations suivantes en raison du coronavirus ?**

7a. Vous avez perdu des revenus d'un emploi ou d'une entreprise  Oui  
 Non  
 Je ne sais pas

a. Vous avez perdu des revenus d'un emploi ou d'une entreprise, veuillez expliquer

---

7b. Vous n'avez pas pu faire vos courses  Oui  
 Non  
 Je ne sais pas

b. Vous n'avez pas pu faire vos courses, veuillez expliquer

---

7c. Vous n'avez pas pu acheter de produits d'entretien ou de gel hydroalcoolique  Oui  
 Non  
 Je ne sais pas

7c. Vous n'avez pas pu acheter de produits d'entretien ou de gel hydroalcoolique, veuillez expliquer

---

7d. Vous n'avez pas pu acheter vos médicaments sur ordonnance  Oui  
 Non  
 Je ne sais pas

d. Vous n'avez pas pu acheter vos médicaments sur ordonnance, veuillez expliquer

---

7e. Vous ou un membre de votre famille avez été harcelés, maltraités ou blessés en raison du coronavirus  Oui  
 Non  
 Je ne sais pas

7e. Vous ou un membre de votre famille avez été harcelé, maltraité ou blessé en raison du coronavirus, veuillez expliquer.

---

8. Dans quelle mesure suivez-vous les consignes de distanciation sociale ou physique, à savoir rester chez vous, rester à l'écart des autres autant que possible, ou rester à l'écart des autres lorsque vous vous trouvez dans un lieu public ?  Très étroitement  
 Plutôt étroitement  
 Pas très étroitement  
 Pas étroitement du tout

Veuillez nous faire part de vos idées et de vos expériences en matière de distanciation sociale ou physique : (question ouverte)

---

9. Avez-vous personnellement effectué un test de dépistage du coronavirus ?  Oui, j'ai été dépisté(e)  
 Non, je n'ai pas été dépisté(e)  
 Je ne sais pas

## Confidential

Page 30

9a. Parmi les personnes dépistées : quel a été le résultat du test ?

- Le test était positif  
 Le test était négatif  
 Je ne sais pas encore

10. Parmi les personnes non dépistées : avez-vous tenté d'effectuer un test de dépistage du coronavirus ?

- Oui  
 Non  
 Je ne sais pas

11. Parmi les personnes non dépistées : Pensez-vous que vous pourriez effectuer un test de dépistage du coronavirus si vous pensiez en avoir besoin ?

- Oui  
 Non  
 Je ne sais pas

11. Veuillez nous expliquer où vous pensez que vous pourriez effectuer un test de dépistage du coronavirus si vous pensiez en avoir besoin.

\_\_\_\_\_

11. Veuillez nous expliquer pourquoi vous pensez que vous ne pourriez pas effectuer de test de dépistage du coronavirus si vous pensiez en avoir besoin.

\_\_\_\_\_

12. Pensez-vous être - ou avoir récemment été - infecté(e) par le coronavirus ?

- Oui  
 Non  
 Je ne sais pas

Veuillez expliquer pourquoi vous pensez être - ou avoir récemment été - infecté(e) par le coronavirus

\_\_\_\_\_

13. S'il existait un vaccin qui empêche de contracter le coronavirus, vous feriez-vous vacciner ?

- Oui  
 Non  
 Je ne sais pas

Veuillez expliquer pourquoi vous vous feriez vacciner s'il existait un vaccin.

\_\_\_\_\_

Veuillez expliquer pourquoi vous ne vous feriez pas vacciner s'il existait un vaccin.

\_\_\_\_\_

Veuillez expliquer pourquoi vous ne savez pas si vous vous feriez vacciner s'il existait un vaccin.

\_\_\_\_\_

14. Connaissez-vous personnellement une personne infectée par le coronavirus (ou COVID-19) ? Cochez toutes les réponses qui s'appliquent.

- Oui, un membre de ma famille  
 Oui, un ami  
 Oui, un voisin  
 Oui, quelqu'un d'autre  
 Non  
 Je ne sais pas

15. Connaissez-vous personnellement une personne décédée d'une infection au coronavirus (ou COVID-19) ? Cochez toutes les réponses qui s'appliquent.

- Oui, un membre de ma famille  
 Oui, un ami  
 Oui, un voisin  
 Oui, quelqu'un d'autre  
 Non  
 Je ne sais pas

*Confidential*

Page 31

---

16. La population parle-t-elle en mauvais termes des personnes qui vivent avec le coronavirus (ou COVID-19), ou en ont été infectées ou supposément infectées ?

- Absolument
- Probablement
- Probablement pas
- Absolument pas
- Je ne sais pas

---

17. Les personnes qui ont été infectées par le coronavirus (ou COVID-19) ont-elles perdu du respect ou leur statut dans la communauté ?

- Absolument
- Probablement
- Probablement pas
- Absolument pas
- Je ne sais pas

Confidential

Page 32

**Section 5 - Questions relatives à votre ménage**

1. Possédez-vous une voiture ?  
 Oui  
 Non  
 Je préfère ne pas répondre
- 
2. Possédez-vous une habitation ?  
 Oui  
 Non  
 Je préfère ne pas répondre
- 
3. Êtes-vous le parent ou le tuteur d'un enfant de moins de 18 ans qui vit dans votre ménage ?  
 Oui  
 Non  
 Je ne sais pas
- 
4. L'école ou la garderie de votre enfant a-t-elle été fermée pendant une quelconque période en raison du coronavirus ?  
 Oui  
 Non  
 Je ne sais pas
- 
5. Si l'école ou la garderie de votre enfant a été fermée pendant au moins deux semaines en raison du coronavirus, dans quelle mesure vous a-t-il été difficile de trouver une solution de garde alternative ?  
 Très difficile  
 Assez difficile  
 Pas très difficile  
 Pas difficile du tout
- 
6. Si vous deviez rester chez vous en raison de mesures de quarantaine ou de la fermeture de votre école ou lieu de travail, pourriez-vous continuer à remplir vos fonctions, même en partie ?  
 Oui  
 Non  
 Ne s'applique pas  
 Je ne sais pas
- 
6. Veuillez expliquer comment vous pourriez continuer à remplir vos fonctions, au moins en partie  
\_\_\_\_\_
- 
6. Veuillez expliquer pourquoi vous ne pourriez pas continuer à remplir vos fonctions, même en partie  
\_\_\_\_\_
- 
7. Vous ou un membre de votre ménage travaillez-vous dans un cadre médical, comme le cabinet d'un médecin, une clinique, un hôpital, une maison de retraite ou le cabinet d'un dentiste ? (Cochez toutes les réponses qui s'appliquent)  
 Oui, moi  
 Oui, un membre de mon ménage  
 Non, personne  
 Je ne sais pas
- 
8. Combien d'enfants de moins de 18 ans vivent actuellement dans votre ménage ?  
\_\_\_\_\_
- 
9. Combien d'adultes de 18 ans ou plus vivent actuellement dans votre ménage, vous y compris ?  
\_\_\_\_\_
- 
10. Avez-vous des enfants à charge ?  
 Oui  
 Non  
 Je ne sais pas



*Confidential*

Page 33

---

11. Vous incombe-t-il de prendre soin de personnes âgées ?

- Oui  
 Non  
 Je ne sais pas

---

Veillez nous parler de votre système de soutien social (amis, famille, voisins) :

---

Confidential

Page 34

**Section 6 : Stress au cours du mois dernier**

|                                                                                                                                      | Jamais                | Presque jamais        | Parfois               | Assez souvent         | Très souvent          |
|--------------------------------------------------------------------------------------------------------------------------------------|-----------------------|-----------------------|-----------------------|-----------------------|-----------------------|
| 1. Au cours du mois dernier, combien de fois avez-vous été contrarié(e) par un événement inattendu ?                                 | <input type="radio"/> |
| 2. Au cours du mois dernier, combien de fois avez-vous pensé ne pas être capable de contrôler les éléments importants de votre vie ? | <input type="radio"/> |
| 3. Au cours du mois dernier, combien de fois vous êtes-vous senti(e) nerveux(-se) et stressé(e) ?                                    | <input type="radio"/> |
| 4. Au cours du mois dernier, combien de fois avez-vous eu confiance en votre capacité à gérer vos problèmes personnels ?             | <input type="radio"/> |
| 5. Au cours du mois dernier, combien de fois avez-vous senti que les choses allaient dans votre sens ?                               | <input type="radio"/> |
| 6. Au cours du mois dernier, combien de fois vous êtes-vous senti(e) débordé(e) par toutes les choses que vous deviez faire ?        | <input type="radio"/> |
| 7. Au cours du mois dernier, combien de fois avez-vous pu contrôler les désagréments de votre vie ?                                  | <input type="radio"/> |
| 8. Au cours du mois dernier, combien de fois avez-vous pensé contrôler la situation ?                                                | <input type="radio"/> |
| 9. Au cours du mois dernier, combien de fois vous êtes-vous mis(e) en colère en raison d'éléments qui échappent à votre contrôle ?   | <input type="radio"/> |

*Confidential*

Page 35

10. Au cours du mois dernier, combien de fois avez-vous pensé devoir affronter tellement de difficultés qu'il vous serait impossible de les surmonter ?

    

11. Veuillez nous parler de votre sentiment de stress au cours du mois dernier :

---

Confidential

Page 36

**Section 7 - Soutien social**

|                                                                          | Absolument pas d'accord | Pas du tout d'accord  | Pas vraiment d'accord | Neutre                | Plutôt d'accord       | Tout à fait d'accord  | Absolument d'accord   |
|--------------------------------------------------------------------------|-------------------------|-----------------------|-----------------------|-----------------------|-----------------------|-----------------------|-----------------------|
| 1. Un être cher m'aide quand j'en ai besoin.                             | <input type="radio"/>   | <input type="radio"/> | <input type="radio"/> | <input type="radio"/> | <input type="radio"/> | <input type="radio"/> | <input type="radio"/> |
| 2. Un être cher me permet de partager mes joies et mes peines.           | <input type="radio"/>   | <input type="radio"/> | <input type="radio"/> | <input type="radio"/> | <input type="radio"/> | <input type="radio"/> | <input type="radio"/> |
| 3. Ma famille fait tout pour m'aider.                                    | <input type="radio"/>   | <input type="radio"/> | <input type="radio"/> | <input type="radio"/> | <input type="radio"/> | <input type="radio"/> | <input type="radio"/> |
| 4. Ma famille me fournit le soutien émotionnel dont j'ai besoin.         | <input type="radio"/>   | <input type="radio"/> | <input type="radio"/> | <input type="radio"/> | <input type="radio"/> | <input type="radio"/> | <input type="radio"/> |
| 5. Un être cher me fournit tout le réconfort dont j'ai besoin.           | <input type="radio"/>   | <input type="radio"/> | <input type="radio"/> | <input type="radio"/> | <input type="radio"/> | <input type="radio"/> | <input type="radio"/> |
| 6. Mes amis font tout pour m'aider.                                      | <input type="radio"/>   | <input type="radio"/> | <input type="radio"/> | <input type="radio"/> | <input type="radio"/> | <input type="radio"/> | <input type="radio"/> |
| 7. Je peux compter sur mes amis quand les choses vont mal.               | <input type="radio"/>   | <input type="radio"/> | <input type="radio"/> | <input type="radio"/> | <input type="radio"/> | <input type="radio"/> | <input type="radio"/> |
| 8. Je peux parler de mes problèmes avec ma famille.                      | <input type="radio"/>   | <input type="radio"/> | <input type="radio"/> | <input type="radio"/> | <input type="radio"/> | <input type="radio"/> | <input type="radio"/> |
| 9. J'ai des amis qui me permettent de partager mes joies et mes peines.  | <input type="radio"/>   | <input type="radio"/> | <input type="radio"/> | <input type="radio"/> | <input type="radio"/> | <input type="radio"/> | <input type="radio"/> |
| 10. J'ai la chance d'avoir un être cher qui se soucie de mes sentiments. | <input type="radio"/>   | <input type="radio"/> | <input type="radio"/> | <input type="radio"/> | <input type="radio"/> | <input type="radio"/> | <input type="radio"/> |
| 11. Ma famille essaie de m'aider à prendre des décisions.                | <input type="radio"/>   | <input type="radio"/> | <input type="radio"/> | <input type="radio"/> | <input type="radio"/> | <input type="radio"/> | <input type="radio"/> |
| 12. Je peux parler de mes problèmes avec mes amis.                       | <input type="radio"/>   | <input type="radio"/> | <input type="radio"/> | <input type="radio"/> | <input type="radio"/> | <input type="radio"/> | <input type="radio"/> |

Confidential

Page 37

**Section 8 : Questions relatives à la santé**

1. De manière générale, diriez-vous que votre état de santé est

- Excellent  
 Très bon  
 Bon  
 Assez bon  
 Mauvais

2. En ce qui concerne votre santé physique, à savoir notamment les maladies et blessures physiques, pendant combien de jours votre santé physique n'a-t-elle pas été bonne au cours des 30 derniers jours ?

\_\_\_\_\_ ((nombre de jours))

3. En ce qui concerne votre santé mentale, à savoir notamment le stress, la dépression et les problèmes émotionnels, pendant combien de jours votre santé mentale n'a-t-elle pas été bonne au cours des 30 derniers jours ?

\_\_\_\_\_ ((nombre de jours))

4. Au cours des 30 derniers jours, pendant combien de jours environ votre mauvais état de santé physique ou mental vous a-t-il empêché de pratiquer vos activités habituelles, comme prendre soin de vous, travailler ou vous divertir ?

\_\_\_\_\_ ((nombre de jours))

5. Au cours de 12 derniers mois, avez-vous eu besoin de soins de santé (par exemple, consulter un médecin) sans pouvoir vous les permettre en raison de leur coût ?

- Oui  
 Non  
 Je ne sais pas

6. Vous ou un membre de votre ménage souffrez-vous d'un grave problème de santé, comme une hypertension artérielle, une maladie cardiaque ou pulmonaire, un cancer ou du diabète ? (Cochez toutes les réponses qui s'appliquent)

- Oui, moi  
 Oui, un membre de mon ménage  
 Non, personne  
 Je ne sais pas

7. Une des propositions ci-dessous s'applique-t-elle à vous ? (Cochez toutes les réponses qui s'appliquent)

- Je suis actuellement enceinte  
 Ma partenaire est actuellement enceinte  
 Ni ma partenaire ni moi ne sommes actuellement enceintes

8. Désirez-vous tomber enceinte ou avoir un enfant au cours de l'année à venir ?

- Oui  
 Non  
 Je ne sais pas

Confidential

Page 38

**Section 9 : Réseaux sociaux****1. Parmi les réseaux sociaux suivants, lesquels utilisez-vous ? (Pour chaque proposition, cochez la réponse la plus appropriée)**

|              | tous les jours        | plusieurs fois par semaine | plusieurs fois par mois | rarement              | jamais                |
|--------------|-----------------------|----------------------------|-------------------------|-----------------------|-----------------------|
| a. Facebook  | <input type="radio"/> | <input type="radio"/>      | <input type="radio"/>   | <input type="radio"/> | <input type="radio"/> |
| b. Twitter   | <input type="radio"/> | <input type="radio"/>      | <input type="radio"/>   | <input type="radio"/> | <input type="radio"/> |
| c. LinkedIn  | <input type="radio"/> | <input type="radio"/>      | <input type="radio"/>   | <input type="radio"/> | <input type="radio"/> |
| d. Instagram | <input type="radio"/> | <input type="radio"/>      | <input type="radio"/>   | <input type="radio"/> | <input type="radio"/> |
| e. WhatsApp  | <input type="radio"/> | <input type="radio"/>      | <input type="radio"/>   | <input type="radio"/> | <input type="radio"/> |
| f. Snapchat  | <input type="radio"/> | <input type="radio"/>      | <input type="radio"/>   | <input type="radio"/> | <input type="radio"/> |
| g. Reddit    | <input type="radio"/> | <input type="radio"/>      | <input type="radio"/>   | <input type="radio"/> | <input type="radio"/> |

2. Dans quelle mesure votre utilisation des réseaux sociaux a-t-elle évolué depuis le début de la pandémie de coronavirus ?

- J'utilise beaucoup plus les réseaux sociaux  
 J'utilise un peu plus les réseaux sociaux  
 Je n'utilise plus les réseaux sociaux  
 Je ne sais pas

2b. Veuillez expliquer dans quelle mesure votre utilisation des réseaux sociaux a évolué depuis le début de la pandémie de coronavirus :

\_\_\_\_\_

Confidential

Page 39

**Section 10 : Questions à caractère démographique**

1. En années, quel âge avez-vous actuellement ?

---

2. Comment décririez-vous vos origines ethniques ?

---

4. Vous considérez-vous de l'une des origines suivantes ? (Cochez toutes les réponses qui s'appliquent)

- Mexicaine  
 Portoricaine  
 Cubaine

4a. Si vous vous considérez comme faisant partie d'une autre ethnie hispanique ou latine que celles énumérées ci-dessus, veuillez préciser :

---

4b. Je ne me considère pas comme d'origine hispanique ou latine

- Vrai  
 Faux

5. Quel niveau scolaire avez-vous atteint ?

- Je n'ai pas terminé l'enseignement secondaire  
 J'ai terminé l'enseignement secondaire  
 J'ai fait des études supérieures, mais ne les ai pas terminées  
 J'ai obtenu mon diplôme universitaire  
 J'ai obtenu un diplôme universitaire de troisième cycle (doctorat, etc.)

Confidential

Page 40

### 6. Le cas échéant, quelle est votre religion actuelle ? Cochez toutes les réponses qui s'appliquent

|                                       | Oui                   | Non                   | Je préfère ne pas répondre |
|---------------------------------------|-----------------------|-----------------------|----------------------------|
| a. Christianisme                      | <input type="radio"/> | <input type="radio"/> | <input type="radio"/>      |
| b. Judaïsme                           | <input type="radio"/> | <input type="radio"/> | <input type="radio"/>      |
| c. Islam                              | <input type="radio"/> | <input type="radio"/> | <input type="radio"/>      |
| d. Bouddhisme                         | <input type="radio"/> | <input type="radio"/> | <input type="radio"/>      |
| e. Hindouisme                         | <input type="radio"/> | <input type="radio"/> | <input type="radio"/>      |
| f. Athéisme (je ne crois pas en Dieu) | <input type="radio"/> | <input type="radio"/> | <input type="radio"/>      |
| g. Autre                              | <input type="radio"/> | <input type="radio"/> | <input type="radio"/>      |
| h. Je ne sais pas                     | <input type="radio"/> | <input type="radio"/> | <input type="radio"/>      |

6g. Autre religion, veuillez préciser

7. Si vous vivez aux États-Unis, veuillez identifier votre ethnie (cochez toutes les réponses qui s'appliquent)

- Amérindien(e) ou alaskain(e)
- Asiatique
- Noir ou Africain(e) américain(e)
- Natif(ve) hawaïen(e)
- Polynésien(e)
- Caucasien(e)
- Autre(s)

7. Vous avez sélectionné autre, veuillez préciser votre autre ethnie

7. À laquelle des catégories suivantes vous identifiez-vous ?

Dans le cadre de cette étude, veuillez utiliser les définitions suivantes.

- Entendant/non-sourd
- Malentendant
- sourd
- Sourd
- SourdAveugle

Entendant/non-sourd : Personne sans perte auditive ;

Malentendant : Personne souffrant d'une certaine perte auditive ;

sourd : Personne souffrant d'une perte auditive ;

Sourd : Personne souffrant d'une perte auditive et s'identifiant à la culture Sourde ;

SourdAveugle : Personne souffrant d'une perte auditive et d'une perte totale ou partielle de la vue.

9. Parmi les propositions ci-dessous, laquelle décrit le mieux votre genre ?

- Homme
- Femme
- Autre option



*Confidential*

Page 41

---

q9. Vous avez sélectionné une autre option pour décrire votre genre, veuillez expliquer :

---

---

10. Vous vous décrivez comme (cochez toutes les réponses qui s'appliquent) :

- Hétérosexuel(le)
- Gay
- Lesbienne
- Bisexuel(le)
- Transgenre
- Aucune des propositions ci-dessus

---

10a. Aucune des propositions ci-dessus, veuillez préciser :

---

*Confidential*

Page 42

### Section 11 : Dernière question

1. Si vous avez d'autres réflexions au sujet du coronavirus et du COVID-19, veuillez nous en faire part :

---

Confidential

Page 43

**Section 12 : Qualité de l'enquête**

**Nous aimerions vous poser quelques questions à propos de cette enquête afin de l'améliorer à l'avenir. Si vous désirez mettre l'accent sur certaines questions spécifiques, veuillez les copier et les coller dans le champ de texte.**

1. En général, les questions de l'enquête étaient >. Autrement dit, vous n'avez pas dû lire plusieurs fois les énoncés pour les comprendre.

- Pas du tout d'accord  
 Pas d'accord  
 Ni d'accord, ni pas d'accord  
 D'accord  
 Tout à fait d'accord

2. Certaines questions spécifiques étaient-elles particulièrement difficiles à comprendre ? Si oui, veuillez préciser lesquelles (aussi précisément que possible)

\_\_\_\_\_

3. En règle générale, la signification des questions était simple et claire

- Pas du tout d'accord  
 Pas d'accord  
 Ni d'accord, ni pas d'accord  
 D'accord  
 Tout à fait d'accord

4. Certaines questions manquaient-elles de clarté ? Si oui, veuillez préciser lesquelles (aussi précisément que possible)

- Oui    Non

4a. Si oui, veuillez préciser lesquelles (aussi précisément que possible)

\_\_\_\_\_

5. Les échelles utilisées pour répondre aux questions étaient adéquates. Autrement dit, selon vous, les échelles fournies vous permettaient-elles de répondre de manière appropriée ?

- Pas du tout d'accord  
 Pas d'accord  
 Ni d'accord, ni pas d'accord  
 D'accord  
 Tout à fait d'accord

6. Selon vous, certaines questions étaient-elles rédigées de manière à ce qu'il n'y ait qu'une SEULE réponse ÉVIDENTE pour vous ?

- Oui  
 No

6b. Veuillez expliquer :

\_\_\_\_\_

N'hésitez pas à indiquer tout autre commentaire au sujet de cette étude

( )

Pour plus d'informations au sujet du coronavirus et du COVID-19, rendez-vous sur

<https://www.gouvernement.fr/info-coronavirus>

<https://www.cdc.gov/coronavirus/2019-ncov/index.html>

<https://www.cdc.gov/coronavirus/2019-ncov/index.html>

projectredcap.org



<https://www.who.int/>

Merci!
