# Supplementary material for: Science, healthcare system, and government effectiveness perception and COVID-19 vaccination acceptance and hesitancy in a global sample: an analytical cross-sectional analysis
Source: PubMed Central journal article supplement — BMJ Open. 2021 Nov 23;11(11):e049716. doi: 10.1136/bmjopen-2021-049716 (PMC8611238; doi:10.1136/bmjopen-2021-049716), 2021-11-23
Supplement: bmjopen-2021-049716supp004.pdf [file bmjopen-2021-049716supp004.pdf]

*Confidential*

Page 1

## Sondaggio globale sul coronavirus

Benvenuto! Con la presente ti invitiamo a partecipare a un sondaggio epidemiologico globale condotto dall'Università di Rochester, in modo da consentirci una migliore comprensione delle opinioni, convinzioni e conoscenze relative ad alcune tematiche legate alle attuali questioni di sanità pubblica, come il coronavirus, il COVID-19, e altre malattie infettive, e i fattori ad esse potenzialmente correlati. Se hai più di 18 anni e sei in grado di rispondere al sondaggio in italiano, puoi cominciare qui sotto!

---

Language

---

Confidential

Page 2

SCHOOL OF MEDICINE AND DENTISTRY

Department of Obstetrics &amp; Gynecology

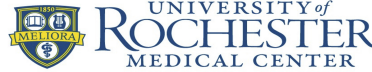**Sondaggio globale sul coronavirus: opinioni e modalità d'intervento****Sperimentatori principali:** Timothy Dye, PhD ed Eva Pressman, MD

Il presente modulo è parte di uno studio sperimentale condotto da alcuni membri del corpo docente della Facoltà di Medicina e Odontoiatria dell'Università di Rochester.

Lo scopo di questo studio è raggiungere una migliore comprensione delle opinioni, convinzioni e conoscenze relative ad alcune tematiche legate alle attuali questioni di sanità pubblica, come il coronavirus e altre malattie infettive, e i fattori ad esse potenzialmente correlati. Lo studio include domande sulle tue opinioni ed esperienze riguardo al coronavirus e al COVID-19, alla salute fisica e mentale, allo stress e al sostegno sociale, oltre a domande demografiche. Puoi saltare tutte le domande che vuoi.

Se decidi di partecipare a questo studio, sarai invitato a completare un sondaggio accessibile su internet attraverso un link. Per completare il questionario ci vorranno circa 20–40 minuti.

Secondo le nostre stime, saranno circa 7000 le persone che prenderanno parte a questo studio.

I rischi legati alla partecipazione sono minimi. Alcune domande potrebbero turbarti o risultare imbarazzanti. Sei libero di saltare tutte le domande alle quali non desideri rispondere. Per proteggere la riservatezza dei dati, le risposte saranno trasmesse in formato crittografato (leggibile solo dal personale autorizzato). Non sono previste indennità.

Non riceverai alcun compenso per la partecipazione a questo sondaggio.

L'Università di Rochester farà tutto il possibile per mantenere confidenziali le informazioni raccolte.

I risultati della ricerca potranno essere presentati in convegni o pubblicazioni, sempre mantenendo nascosta l'identità delle singole persone che hanno risposto.

**La tua partecipazione allo studio è assolutamente volontaria.** Sei libero di non partecipare e puoi ritirarti in qualsiasi momento. Se decidi di interrompere la compilazione, non sarà per noi possibile eliminare le informazioni già acquisite, poiché non saremmo in grado di rintracciare ed eliminare le risposte da te fornite dal momento che non raccogliamo alcun dato personale.

L'Università di Rochester sta ricevendo un pagamento dalla Mae Stone Goode Foundation per aver condotto questo studio di ricerca.

Per ulteriori informazioni o domande su questa ricerca puoi rivolgerti al Dr. Timothy Dye, e-mail [tim\\_dye@urmc.rochester.edu](mailto:tim_dye@urmc.rochester.edu).

Sei pregato di contattare il Comitato etico per la ricerca dell'Università di Rochester: University of Rochester Research Subjects Review Board, 265 Crittenden Blvd., CU 420315, Rochester, NY 14642, Telefono +1 (585) 276-0005 o +1 (877) 449-4441 nel caso tu avessi l'esigenza:

- di parlare con una persona indipendente dal gruppo di ricerca riguardo ai tuoi diritti in quanto partecipante alla ricerca;
- di esprimere dubbi sulla ricerca.

RSRB STUDY00004825  
Version Date: April 28, 2020

RSRB Approval Date: 4/28/2020

**Confidential**

Page 3

---

Sondaggio globale sul coronavirus: opinioni e modalità d'intervento

Sperimentatori principali: Timothy Dye, PhD ed Eva Pressman, MD

Il presente modulo è parte di uno studio sperimentale condotto da alcuni membri del corpo docente della Facoltà di Medicina e Odontoiatria dell'Università di Rochester.

Lo scopo di questo studio è raggiungere una migliore comprensione delle opinioni, convinzioni e conoscenze relative ad alcune tematiche legate alle attuali questioni di sanità pubblica, come il coronavirus e altre malattie infettive, e i fattori ad esse potenzialmente correlati. Lo studio include domande sulle tue opinioni ed esperienze riguardo al coronavirus e al COVID-19, alla salute fisica e mentale, allo stress e al sostegno sociale, oltre a domande demografiche. Puoi saltare tutte le domande che vuoi.

Se decidi di partecipare a questo studio, sarai invitato a completare un sondaggio accessibile su internet attraverso un link. Per completare il questionario ci vorranno circa 15-25 minuti. Secondo le nostre stime, saranno circa 7000 le persone che prenderanno parte a questo studio.

I rischi legati alla partecipazione sono minimi. Alcune domande potrebbero turbarti o risultare imbarazzanti. Sei libero di saltare tutte le domande alle quali non desideri rispondere. Per proteggere la riservatezza dei dati, le risposte saranno trasmesse in formato crittografato (leggibile solo dal personale autorizzato). Non sono previste indennità.

Non riceverai alcun compenso per la partecipazione a questo sondaggio.

L'Università di Rochester farà tutto il possibile per mantenere confidenziali le informazioni raccolte. I risultati della ricerca potranno essere presentati in convegni o pubblicazioni, sempre mantenendo nascosta l'identità delle singole persone che hanno risposto.

La tua partecipazione allo studio è assolutamente volontaria. Sei libero di non partecipare e puoi ritirarti in qualsiasi momento. Se decidi di interrompere la compilazione, non sarà per noi possibile eliminare le informazioni già acquisite, poiché non saremmo in grado di rintracciare ed eliminare le risposte da te fornite dal momento che non raccogliamo alcun dato personale.

L'Università di Rochester sta ricevendo un pagamento dalla Mae Stone Goode Foundation per aver condotto questo studio di ricerca.

Per ulteriori informazioni o domande su questa ricerca puoi rivolgerti al Dr. Timothy Dye, e-mail [tim\\_dye@urmc.rochester.edu](mailto:tim_dye@urmc.rochester.edu).

Sei pregato di contattare il Comitato etico per la ricerca dell'Università di Rochester: University of Rochester Research Subjects Review Board, 265 Crittenden Blvd., CU 420315, Rochester, NY 14642, Telefono +1 (585) 276-0005 o + 1 (877) 449-4441 nel caso tu avessi l'esigenza:

di parlare con una persona indipendente dal gruppo di ricerca riguardo ai tuoi diritti in quanto partecipante alla ricerca; di esprimere dubbi sulla ricerca.

---

Vuoi cominciare il sondaggio?

Sì  
 No

Confidential

Page 4

**Sezione 1: domande sulla nazionalità**

Confidential

Page 5

1. In quale paese vivi?

- afghanistan
- Albania
- algeria
- andorra
- angola
- anguilla
- Antartide [a]
- Antigua e Barbuda
- Arabia saudita
- Argentina
- Armenia
- aruba
- Australia [b]
- Austria
- Azerbaijan
- Bahamas (la)
- Bahrain
- bangladesh
- barbados
- Belgio
- Belize
- benin
- Bhutan
- Bielorussia
- Bolivia (stato plurinazionale di)
- Bonaire
- Bosnia ed Erzegovina
- Botswana
- Brasile
- Brunei Darussalam [e]
- Bulgaria
- Burkina Faso
- burundi
- Cambogia
- Camerun
- Canada
- Capo Verde [f]
- chad
- chile
- Cipro
- Cocos (Keeling) Islands (the)
- Colombia
- Comore (las)
- Congo (Repubblica Democratica del)
- Congo (the) [g]
- Corea (Repubblica democratica popolare di) [o]
- Corea (Repubblica di) [p]
- Costa d'Avorio [h]
- Costa Rica
- Croazia
- Cuba
- Curagao
- Danimarca
- dominica
- Ecuador
- Egitto
- El Salvador
- Emirati Arabi Uniti (el)
- eritrea
- Estonia
- Eswatini [j]
- Etiopia
- fiji
- Filippine (il)
- Finlandia
- Francia [l]
- French Southern Territories (the) [m]
- Gabon
- Gambia

12/04/2020 9:13am

projectredcap.org

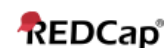

- Georgia
- Georgia del Sud e Isole Sandwich Meridionali
- Germania
- Ghana
- Giamaica
- Giappone
- Gibilterra
- Gibuti
- Giordania
- Granada
- Grecia
- Groenlandia
- Guadalupe
- guam
- Guatemala
- Guiana
- Guinea
- Guinea Equatoriale
- Guinea-Bissau
- Guyana francese
- Honduras
- Hong Kong
- incontro
- India
- Indonesia
- Iran (Repubblica islamica di)
- Iraq
- Irlanda
- Islanda
- Isola Bouvet
- Isola di Ascencion
- Isola di Man
- Isola di natale
- Isola Norfolk
- Isole Aland
- Isole Bermuda
- Isole Cayman
- Isole Cook
- Isole Falkland (the) [Falklands] [k]
- Isole Faroe
- Isole Heard e McDonald
- Isole Marianne Settentrionali
- Isole Marshall
- Isole minori esterne degli Stati Uniti (the) [ac]
- Isole Salomone
- Isole Turks e Caicos (Ia)
- Isole Vergini (USA,) [Ag]
- Isole Vergini britanniche [af]
- Israele
- Italia
- Jan Mayen
- Kazakistan
- Kenia
- Kiribati
- Kuwait
- Kyrgyzstan
- Lesoto
- Lettonia
- Libano
- Liberia
- Libia
- Liechtenstein
- Lituania
- Lussemburgo
- Macao [r]
- Macedonia settentrionale [s]
- Madagascar
- maglia
- maglione
- malawi
- Malaysia

- Maldive
- mali
- Malta
- Marocco
- Martinique
- Mauricio
- Mauritania
- mayotte
- Messico
- Micronesia (Stati Federati di)
- Moldavia (Repubblica di)
- Monaco
- Mongolia
- montenegro
- montserrat
- Mozambico
- Myanmar [t]
- Namibia
- nauru
- Nepal
- Nicaragua
- Niger (la)
- Nigeria
- Niue
- Norvegia
- Nuova Caledonia
- Nuova Zelanda
- Oman
- Paesi Bassi (la)
- Pakistan
- Palau
- Palestina, Stato di
- Panama
- Papua Nuova Guinea
- Paraguay
- Perù
- Pitcairn [u]
- Polinesia Francese
- Polonia
- porcellana
- Portogallo
- Puerto Rico
- Qatar
- Regno Unito di Gran Bretagna e Irlanda del Nord (il)
- Repubblica araba siriana (la) [x]
- Repubblica Ceca [i]
- Repubblica Centrafricana
- Repubblica Democratica Popolare del Laos (la) [q]
- Repubblica Dominicana
- Romania
- Ruanda
- Russian Federation (the) [v]
- Saba
- Sahara occidentale [ah]
- Saint Kitts e Nevis
- Saint Martin (parte francese)
- Saint Pierre e Miquelon
- Saint Vincent e Grenadine
- samoa
- Samoa americane
- San Bartolomeo
- San Marino
- Sant'Elena
- Sant'Eustachio
- Santa Lucia
- Santa Sede (il) [n]
- Sao Tome e Principe
- Senegal
- Serbia
- Seychelles

- Sierra Leone
- Singapore
- Sint Maarten (parte olandese)
- Slovacchia
- Slovenia
- Somalia
- Spagna
- Sri Lanka
- Stati Uniti d'America (the)
- Sudafrica
- Sudan (la)
- Sudan del sud
- Suriname
- Svalbard
- Svezia
- Svizzera
- Taiwan (Provincia della Cina) [e]
- Tajikistan
- Tanzania, Repubblica unita di
- Territorio britannico dell'Oceano Indiano (el)
- Thailandia
- Timor Est [aa]
- togo
- Tokelau
- tonga
- Trinidad e Tobago
- Tristan da Cunha
- Tunisia
- Turchia
- Turkmenistan
- Tuvalu
- Ucraina
- Uganda
- Ungheria
- Uruguay
- Uzbekistan
- Vanuatu
- Venezuela (Repubblica Bolivariana di)
- Vietnam [ae]
- Wallis e Futuna
- yemen
- Zambia
- Zimbabwe
- Altro

---

Se risiedi in un altro paese, per favore specifica quale

---



*Confidential*

Page 9

1b. Se sei residente negli Stati Uniti, in quale stato vivi?

- New York
- Alabama
- Alaska
- Arizona
- Arkansas
- California
- Colorado
- Connecticut
- Delaware
- Florida
- Georgia
- Hawaii
- Idaho
- Illinois
- Indiana
- Iowa
- Kansas
- Kentucky
- Louisiana
- Maine
- Maryland
- Massachusetts
- Michigan
- Minnesota
- Mississippi
- Missouri
- Montana
- Nebraska
- Nevada
- New Hampshire
- New Jersey
- New Mexico
- North Carolina
- North Dakota
- Ohio
- Oklahoma
- Oregon
- Pennsylvania
- Rhode Island
- South Carolina
- South Dakota
- Tennessee
- Texas
- Utah
- Vermont
- Virginia
- Washington
- West Virginia
- Wisconsin
- Wyoming

*Confidential*

Page 10

1c. Se risiedi in India, in quale stato vivi?

- IN-AP = Andhra Pradesh
- IN-AR = Arunachal Pradesh
- IN-AS = Assam
- IN-BR = Bihar
- IN-CT = Chhattisgarh
- IN-GA = Goa
- IN-GJ = Gujarat
- IN-HR = Haryana
- IN-HP = Himachal Pradesh
- IN-JH = Jharkhand
- IN-KA = Karnataka
- IN-KL = Kerala
- IN-MP = Madhya Pradesh
- IN-MH = Maharashtra
- IN-MN = Manipur
- IN-ML = Meghalaya
- IN-MZ = Mizoram
- IN-NL = Nagaland
- IN-OR = Odisha
- IN-PB = Punjab
- IN-RJ = Rajasthan
- IN-SK = Sikkim
- IN-TN = Tamil Nadu
- IN-TG = Telangana
- IN-TR = Tripura
- IN-UT = Uttarakhand
- IN-UP = Uttar Pradesh
- IN-WB = West Bengal
- IN-AN = Andaman and Nicobar Islands
- IN-CH = Chandigarh
- IN-DN = Dadra and Nagar Haveli
- IN-DD = Daman and Diu
- IN-DL = Delhi
- IN-JK = Jammu and Kashmir
- IN-LA = Ladakh
- IN-LD = Lakshadweep
- IN-PY = Puducherry

Confidential

Page 11

2. In quale paese sei nato?

- afghanistan
- Albania
- algeria
- andorra
- angola
- anguilla
- Antartide [a]
- Antigua e Barbuda
- Arabia saudita
- Argentina
- Armenia
- aruba
- Australia [b]
- Austria
- Azerbaijan
- Bahamas (la)
- Bahrain
- bangladesh
- barbados
- Belgio
- Belize
- benin
- Bhutan
- Bielorussia
- Bolivia (stato plurinazionale di)
- Bonaire
- Bosnia ed Erzegovina
- Botswana
- Brasile
- Brunei Darussalam [e]
- Bulgaria
- Burkina Faso
- burundi
- Cambogia
- Camerun
- Canada
- Capo Verde [f]
- chad
- chile
- Cipro
- Cocos (Keeling) Islands (the)
- Colombia
- Comore (las)
- Congo (Repubblica Democratica del)
- Congo (the) [g]
- Corea (Repubblica democratica popolare di) [o]
- Corea (Repubblica di) [p]
- Costa d'Avorio [h]
- Costa Rica
- Croazia
- Cuba
- Curagao
- Danimarca
- dominica
- Ecuador
- Egitto
- El Salvador
- Emirati Arabi Uniti (el)
- eritrea
- Estonia
- Eswatini [j]
- Etiopia
- fiji
- Filippine (il)
- Finlandia
- Francia [l]
- French Southern Territories (the) [m]
- Gabon
- Gambia

12/04/2020 9:13am

projectredcap.org

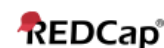

- Georgia
- Georgia del Sud e Isole Sandwich Meridionali
- Germania
- Ghana
- Giamaica
- Giappone
- Gibilterra
- Gibuti
- Giordania
- Granada
- Grecia
- Groenlandia
- Guadalupe
- guam
- Guatemala
- Guiana
- Guinea
- Guinea Equatoriale
- Guinea-Bissau
- Guyana francese
- Honduras
- Hong Kong
- incontro
- India
- Indonesia
- Iran (Repubblica islamica di)
- Iraq
- Irlanda
- Islanda
- Isola Bouvet
- Isola di Ascencion
- Isola di Man
- Isola di natale
- Isola Norfolk
- Isole Aland
- Isole Bermuda
- Isole Cayman
- Isole Cook
- Isole Falkland (the) [Falklands] [k]
- Isole Faroe
- Isole Heard e McDonald
- Isole Marianne Settentrionali
- Isole Marshall
- Isole minori esterne degli Stati Uniti (the) [ac]
- Isole Salomone
- Isole Turks e Caicos (Ia)
- Isole Vergini (USA,) [Ag]
- Isole Vergini britanniche [af]
- Israele
- Italia
- Jan Mayen
- Kazakistan
- Kenia
- Kiribati
- Kuwait
- Kyrgyzstan
- Lesoto
- Lettonia
- Libano
- Liberia
- Libia
- Liechtenstein
- Lituania
- Lussemburgo
- Macao [r]
- Macedonia settentrionale [s]
- Madagascar
- maglia
- maglione
- malawi
- Malaysia

- Maldive
- mali
- Malta
- Marocco
- Martinique
- Mauricio
- Mauritania
- mayotte
- Messico
- Micronesia (Stati Federati di)
- Moldavia (Repubblica di)
- Monaco
- Mongolia
- montenegro
- montserrat
- Mozambico
- Myanmar [t]
- Namibia
- nauru
- Nepal
- Nicaragua
- Niger (la)
- Nigeria
- Niue
- Norvegia
- Nuova Caledonia
- Nuova Zelanda
- Oman
- Paesi Bassi (la)
- Pakistan
- Palau
- Palestina, Stato di
- Panama
- Papua Nuova Guinea
- Paraguay
- Perù
- Pitcairn [u]
- Polinesia Francese
- Polonia
- porcellana
- Portogallo
- Puerto Rico
- Qatar
- Regno Unito di Gran Bretagna e Irlanda del Nord (il)
- Repubblica araba siriana (la) [x]
- Repubblica Ceca [i]
- Repubblica Centrafricana
- Repubblica Democratica Popolare del Laos (la) [q]
- Repubblica Dominicana
- Romania
- Ruanda
- Russian Federation (the) [v]
- Saba
- Sahara occidentale [ah]
- Saint Kitts e Nevis
- Saint Martin (parte francese)
- Saint Pierre e Miquelon
- Saint Vincent e Grenadine
- samoa
- Samoa americane
- San Bartolomeo
- San Marino
- Sant'Elena
- Sant'Eustachio
- Santa Lucia
- Santa Sede (il) [n]
- Sao Tome e Principe
- Senegal
- Serbia
- Seychelles

- Sierra Leone
- Singapore
- Sint Maarten (parte olandese)
- Slovacchia
- Slovenia
- Somalia
- Spagna
- Sri Lanka
- Stati Uniti d'America (the)
- Sudafrica
- Sudan (la)
- Sudan del sud
- Suriname
- Svalbard
- Svezia
- Svizzera
- Taiwan (Provincia della Cina) [e]
- Tajikistan
- Tanzania, Repubblica unita di
- Territorio britannico dell'Oceano Indiano (el)
- Thailandia
- Timor Est [aa]
- togo
- Tokelau
- tonga
- Trinidad e Tobago
- Tristan da Cunha
- Tunisia
- Turchia
- Turkmenistan
- Tuvalu
- Ucraina
- Uganda
- Ungheria
- Uruguay
- Uzbekistan
- Vanuatu
- Venezuela (Repubblica Bolivariana di)
- Vietnam [ae]
- Wallis e Futuna
- yemen
- Zambia
- Zimbabwe
- Altro

---

Se sei nato in un altro paese, per favore specifica quale

---

Confidential

Page 15

**Sezione 2: Opinioni riguardo alla salute**

**Ciascuna delle affermazioni sotto riportate rappresenta una tua convinzione relativa alla tua salute, riguardo alla quale puoi esprimere il tuo grado di accordo o disaccordo. Questa è una misura delle tue idee personali; non ci sono risposte giuste o sbagliate. Ti invitiamo a esprimere il tuo grado di accordo o disaccordo con ciascuna delle affermazioni sotto riportate.**

|                                                                                                                 | Per niente d'accordo  | Poco d'accordo        | Mediamente d'accordo  | D'accordo             | Molto d'accordo       |
|-----------------------------------------------------------------------------------------------------------------|-----------------------|-----------------------|-----------------------|-----------------------|-----------------------|
| 1. Se mi ammalo, sarà il mio comportamento a determinare quanto tempo mi occorrerà per tornare in salute.       | <input type="radio"/> |
| 2. Indipendentemente da quello che faccio, se devo ammalarmi, mi ammalero.                                      | <input type="radio"/> |
| 3. Fissare controlli regolari con il mio medico è il modo migliore per evitare di ammalarmi.                    | <input type="radio"/> |
| 4. La maggior parte delle cose che incidono sulla mia salute capitano per caso.                                 | <input type="radio"/> |
| 5. Ogni volta che non mi sento bene, ritengo giusto consultare un professionista specializzato in campo medico. | <input type="radio"/> |
| 6. Sono io che ho il controllo sulla mia salute.                                                                | <input type="radio"/> |
| 7. Per molti versi, il fatto che io possa ammalarmi o rimanere sano dipende dalla mia famiglia.                 | <input type="radio"/> |
| 8. Quando mi ammalo, è per colpa mia.                                                                           | <input type="radio"/> |
| 9. La velocità con cui mi ristabilisco da una malattia dipende in gran parte dalla fortuna.                     | <input type="radio"/> |
| 10. Gli operatori sanitari hanno il controllo della mia salute                                                  | <input type="radio"/> |

*Confidential*

Page 16

- |                                                                                                                                        |                       |                       |                       |                       |                       |
|----------------------------------------------------------------------------------------------------------------------------------------|-----------------------|-----------------------|-----------------------|-----------------------|-----------------------|
| 11. La mia buona salute è in gran parte una questione di fortuna.                                                                      | <input type="radio"/> |
| 12. Più di ogni altra cosa è ciò che faccio ad avere il maggiore impatto sulla mia salute.                                             | <input type="radio"/> |
| 13. Se ho cura di me stesso, posso evitare di ammalarmi.                                                                               | <input type="radio"/> |
| 14. Di solito guarisco dalle malattie perché altre persone (ad esempio medici, infermieri, familiari, amici) si sono prese cura di me. | <input type="radio"/> |
| 15. Indipendentemente da ciò che faccio, tendo ad ammalarmi molto facilmente.                                                          | <input type="radio"/> |
| 16. Se è scritto che resterò sano, non mi ammalerò.                                                                                    | <input type="radio"/> |
| 17. Se farò le cose giuste, resterò in salute.                                                                                         | <input type="radio"/> |
| 18. Per quanto riguarda la mia salute, faccio soltanto ciò che mi prescrive il mio medico.                                             | <input type="radio"/> |



Confidential

Page 17

**Sezione 3 - Convinzioni riguardo al coronavirus****1. Per quanto è a tua conoscenza, gli esperti della sanità pubblica hanno raccomandato le seguenti azioni allo scopo di contribuire a rallentare la diffusione del coronavirus?**

|                                                               | Sì, l'hanno consigliato | No, non l'hanno consigliato | Non saprei            |
|---------------------------------------------------------------|-------------------------|-----------------------------|-----------------------|
| a. Lavarsi spesso le mani                                     | <input type="radio"/>   | <input type="radio"/>       | <input type="radio"/> |
| b. Bollire l'acqua prima di berla                             | <input type="radio"/>   | <input type="radio"/>       | <input type="radio"/> |
| c. Le persone sane devono indossare la mascherina in pubblico | <input type="radio"/>   | <input type="radio"/>       | <input type="radio"/> |
| d. Evitare assembramenti con un grande numero di persone      | <input type="radio"/>   | <input type="radio"/>       | <input type="radio"/> |
| e. Utilizzare il repellente per le zanzare                    | <input type="radio"/>   | <input type="radio"/>       | <input type="radio"/> |
| f. Restare a casa se ci si sente male                         | <input type="radio"/>   | <input type="radio"/>       | <input type="radio"/> |

g. Altre raccomandazioni

Confidential

Page 18

**2. Per quanto è a tua conoscenza, quale delle seguenti modalità contribuisce alla trasmissione o alla diffusione del coronavirus?**

|                                                                                                                           | Sì, si trasmette in questo modo | No, non si trasmette in questo modo | Non saprei            |
|---------------------------------------------------------------------------------------------------------------------------|---------------------------------|-------------------------------------|-----------------------|
| a. Stando in stretta vicinanza fisica con una persona infetta                                                             | <input type="radio"/>           | <input type="radio"/>               | <input type="radio"/> |
| b. Toccando le superfici sulle quali sono presenti piccole quantità di fluidi corporei appartenenti a una persona infetta | <input type="radio"/>           | <input type="radio"/>               | <input type="radio"/> |
| c. Attraverso le punture di zanzara                                                                                       | <input type="radio"/>           | <input type="radio"/>               | <input type="radio"/> |
| d. Attraverso i geni/la genetica                                                                                          | <input type="radio"/>           | <input type="radio"/>               | <input type="radio"/> |

e. In quali altri modi si trasmette o si diffonde il coronavirus? Per piacere, motiva la risposta

---

Confidential

Page 19

**3. Per ciascuna delle seguenti voci, indica se la ritieni un sintomo comune dell'infezione da coronavirus (COVID-19)**

|                                     | Sì, è un sintomo      | No, non è un sintomo  | Non saprei            |
|-------------------------------------|-----------------------|-----------------------|-----------------------|
| a. Febbre                           | <input type="radio"/> | <input type="radio"/> | <input type="radio"/> |
| b. Tosse secca                      | <input type="radio"/> | <input type="radio"/> | <input type="radio"/> |
| c. Vomito                           | <input type="radio"/> | <input type="radio"/> | <input type="radio"/> |
| d. Congestione nasale/naso che cola | <input type="radio"/> | <input type="radio"/> | <input type="radio"/> |
| e. Eruzione cutanea                 | <input type="radio"/> | <input type="radio"/> | <input type="radio"/> |

f. Altri sintomi (si prega di descriverli:)

---

Confidential

Page 20

**4. Ritieni che uno dei seguenti gruppi di persone abbia un rischio maggiore di sviluppare gravi patologie mediche se viene infettato dal coronavirus?**

|                                                 | Sì, è a maggior rischio | No, non è a maggior rischio | Non saprei            |
|-------------------------------------------------|-------------------------|-----------------------------|-----------------------|
| a. Bambini                                      | <input type="radio"/>   | <input type="radio"/>       | <input type="radio"/> |
| b. Donne in gravidanza                          | <input type="radio"/>   | <input type="radio"/>       | <input type="radio"/> |
| c. Persone affette da patologie croniche        | <input type="radio"/>   | <input type="radio"/>       | <input type="radio"/> |
| d. Persone che hanno da poco superato i 20 anni | <input type="radio"/>   | <input type="radio"/>       | <input type="radio"/> |
| e. Persone obese                                | <input type="radio"/>   | <input type="radio"/>       | <input type="radio"/> |
| f. Persone oltre i 60 anni                      | <input type="radio"/>   | <input type="radio"/>       | <input type="radio"/> |

5. Per quanto a tua conoscenza, esiste un vaccino per proteggere le persone dall'attuale coronavirus, noto anche come COVID-19, oppure no?  Sì  No  Non saprei

6. Per quanto a tua conoscenza, il vaccino contro l'influenza o l'influenza stagionale protegge le persone dall'attuale coronavirus, noto anche come COVID-19, oppure no?  Sì  No  Non saprei

7. Per quanto a tua conoscenza, cosa dovrebbe fare una persona che ritenga di aver sviluppato i sintomi del coronavirus?

Restare a casa e chiamare un medico o un operatore sanitario

Cercare immediatamente assistenza sanitaria recandosi al pronto soccorso o in una struttura di emergenza

Qualcos'altro

Non saprei

7a. Qualcos'altro, per favore specificare

---

*Confidential*

Page 21

**Sezione 4 - Preoccupazioni ed esperienze nell'ambito della salute**

1. Pensi di avere informazioni sufficienti sulle modalità per proteggere te stesso e la tua famiglia dal coronavirus?  Sì  No  Non saprei

2. Che cosa stai facendo per proteggere te stesso e la tua famiglia dal coronavirus?

3. Pensi che la preoccupazione o lo stress legati al coronavirus abbiano avuto un impatto negativo sulla tua salute mentale oppure no?  Sì - un notevole impatto  Sì - un piccolo impatto  No  Non saprei

3b. Per piacere, motiva la risposta:

Confidential

Page 22

**q4. - In che misura ritieni che ciascuna delle seguenti categorie sia intervenuta efficacemente contro il coronavirus e il COVID-19?**

- a. Il sistema sanitario (compresi ospedali, ambulatori, medici, infermieri e altri operatori sanitari)
- Per nulla efficace  
 Non molto efficace  
 Abbastanza efficace  
 Molto efficace

a. Per piacere, motiva la risposta:

\_\_\_\_\_

- b. La comunità scientifica (compresi ricercatori e analisti)
- Per nulla efficace  
 Non molto efficace  
 Abbastanza efficace  
 Molto efficace

b. Per piacere, motiva la risposta:

\_\_\_\_\_

- c. Il governo (comprese le autorità locali e regionali)
- Per nulla efficace  
 Non molto efficace  
 Abbastanza efficace  
 Molto efficace

c. Per piacere, motiva la risposta:

\_\_\_\_\_

- d. Il sistema educativo (comprese scuole primarie, secondarie e università)
- Per nulla efficace  
 Non molto efficace  
 Abbastanza efficace  
 Molto efficace

d. Per piacere, motiva la risposta:

\_\_\_\_\_

- e. Rivenditori al dettaglio e servizi locali (inclusi negozi, supermercati, ristoranti)
- Per nulla efficace  
 Non molto efficace  
 Abbastanza efficace  
 Molto efficace

e. Per piacere, motiva la risposta:

\_\_\_\_\_

- f. Le imprese (compresi grande industria, fabbriche, produttori)
- Per nulla efficace  
 Non molto efficace  
 Abbastanza efficace  
 Molto efficace

f. Per piacere, motiva la risposta:

\_\_\_\_\_

*Confidential*

Page 23

---

g. La stampa (inclusi giornalisti, quotidiani, televisione e mezzi di comunicazione visiva)

- Per nulla efficace  
 Non molto efficace  
 Abbastanza efficace  
 Molto efficace

---

g. Per piacere, motiva la risposta:

---

---

h. Le piattaforme dei social media

- Per nulla efficace  
 Non molto efficace  
 Abbastanza efficace  
 Molto efficace

---

h. Per piacere, motiva la risposta:

---

Confidential

Page 24

**5. Ammesso che tu sia preoccupato, in quale misura lo sei per ciascuna delle seguenti tematiche?**

|                                                                                                                                                       | Molto preoccupato     | Abbastanza preoccupato | Poco preoccupato      | Per nulla preoccupato | Non saprei            |
|-------------------------------------------------------------------------------------------------------------------------------------------------------|-----------------------|------------------------|-----------------------|-----------------------|-----------------------|
| a. Tu o un membro della tua famiglia potreste contrarre il coronavirus                                                                                | <input type="radio"/> | <input type="radio"/>  | <input type="radio"/> | <input type="radio"/> | <input type="radio"/> |
| b. Subirai una contrazione del reddito perché perderai il posto di lavoro o dovrai fare orari ridotti a causa del coronavirus                         | <input type="radio"/> | <input type="radio"/>  | <input type="radio"/> | <input type="radio"/> | <input type="radio"/> |
| c. Potresti contrarre la malattia di Lyme                                                                                                             | <input type="radio"/> | <input type="radio"/>  | <input type="radio"/> | <input type="radio"/> | <input type="radio"/> |
| d. Il coronavirus avrà un impatto negativo sui tuoi investimenti, per esempio la pensione o i fondi accantonati per gli studi universitari/il college | <input type="radio"/> | <input type="radio"/>  | <input type="radio"/> | <input type="radio"/> | <input type="radio"/> |
| e. Potresti contrarre la febbre dengue                                                                                                                | <input type="radio"/> | <input type="radio"/>  | <input type="radio"/> | <input type="radio"/> | <input type="radio"/> |
| f. Ti esporrai al rischio di contrarre il coronavirus perché non potrai permetterti di restare a casa senza lavorare                                  | <input type="radio"/> | <input type="radio"/>  | <input type="radio"/> | <input type="radio"/> | <input type="radio"/> |
| g. Non potrai permetterti di effettuare il test o i trattamenti per il coronavirus se dovessero rendersi necessari                                    | <input type="radio"/> | <input type="radio"/>  | <input type="radio"/> | <input type="radio"/> | <input type="radio"/> |

h. Se hai ulteriori preoccupazioni, per favore descrivile

---

5b. In quale misura la tua vita è stata sconvolta dall'epidemia di coronavirus, ammesso che lo sia stata?

- Molto  
 Abbastanza  
 Molto poco  
 Per nulla  
 Non saprei

5b. Per favore spiega in quale misura la tua vita è stata sconvolta dall'epidemia di coronavirus, ammesso che lo sia stata?

---



Confidential

Page 25

**6. Per favore indica se hai intrapreso una delle seguenti azioni a causa della recente epidemia di coronavirus.**

|                                                                                                                        | Sì                    | No                    | Non saprei            |
|------------------------------------------------------------------------------------------------------------------------|-----------------------|-----------------------|-----------------------|
| a. Ho deciso di annullare i viaggi oppure ho modificato i programmi di viaggio                                         | <input type="radio"/> | <input type="radio"/> | <input type="radio"/> |
| b. Ho acquistato una mascherina protettiva                                                                             | <input type="radio"/> | <input type="radio"/> | <input type="radio"/> |
| c. Ho fatto scorta di prodotti, per esempio alimentari e articoli per la casa                                          | <input type="radio"/> | <input type="radio"/> | <input type="radio"/> |
| d. Ho rimandato o annullato visite mediche                                                                             | <input type="radio"/> | <input type="radio"/> | <input type="radio"/> |
| e. Ho fatto scorta dei farmaci con obbligo di ricetta                                                                  | <input type="radio"/> | <input type="radio"/> | <input type="radio"/> |
| f. Sono rimasto a casa anziché recarmi al lavoro, a scuola o a svolgere le mie abituali attività                       | <input type="radio"/> | <input type="radio"/> | <input type="radio"/> |
| g. Ho rimandato o annullato un intervento medico o un'operazione chirurgica                                            | <input type="radio"/> | <input type="radio"/> | <input type="radio"/> |
| h. Ho annullato i progetti di partecipare a eventi in luoghi affollati, per esempio concerti o manifestazioni sportive | <input type="radio"/> | <input type="radio"/> | <input type="radio"/> |
| i. Mi sono licenziato                                                                                                  | <input type="radio"/> | <input type="radio"/> | <input type="radio"/> |

6b. Per favore, aggiungi qualsiasi ulteriore spiegazione o dettaglio riguardo alle voci sopra elencate

---

Confidential

Page 26

**7. Hai vissuto una delle seguenti esperienze a causa del coronavirus?**

7a. Ho perduto gli introiti derivanti da un lavoro o un'attività  Sì  
 No  
 Non saprei

a. Ho perduto gli introiti derivanti da un lavoro o un'attività, per favore specifica

---

7b. Non sono riuscito a procurarmi prodotti alimentari  Sì  
 No  
 Non saprei

b. Non sono riuscito a procurarmi prodotti alimentari, per favore specifica

---

7c. Non sono riuscito a procurarmi prodotti per la pulizia o igienizzante per le mani  Sì  
 No  
 Non saprei

7c. Non sono riuscito a procurarmi prodotti per la pulizia o igienizzante per le mani, per favore specifica

---

7d. Non sono riuscito a procurarmi i farmaci con obbligo di prescrizione  Sì  
 No  
 Non saprei

d. Non sono riuscito a procurarmi i farmaci con obbligo di prescrizione, per favore specifica

---

7e. Uno dei membri della tua famiglia è stato molestato, maltrattato o percosso a causa del coronavirus  Sì  
 No  
 Non saprei

7e. Se vi sono state molestie, maltrattamenti o percosse a causa del coronavirus, per favore specifica

---

8. Quanto scrupolosamente stai rispettando il distanziamento sociale o fisico, quindi resti a casa e lontano dalle altre persone ogni volta che puoi, oppure ti tieni distante dalle altre persone quando sei in un luogo pubblico?  Molto scrupolosamente  
 Abbastanza scrupolosamente  
 Non molto scrupolosamente  
 Non sono per niente scrupoloso

Per favore aggiungi ulteriori commenti sulle tue opinioni ed esperienze di distanziamento sociale o fisico: (domanda aperta)

---

9. Ti sei sottoposto personalmente al test per il coronavirus oppure no?  Sì, mi sono sottoposto al test  
 No, non mi sono sottoposto al test  
 Non saprei

## Confidential

Page 27

9a. Per coloro che si sono sottoposti al test: qual è stato il risultato del test per il coronavirus?

- Il test è risultato positivo  
 Il test è risultato negativo  
 Sono in attesa dell'esito del test

10. Per coloro che non si sono sottoposti al test: hai cercato di sottoposti al test per il coronavirus oppure no?

- Sì  
 No  
 Non saprei

11. Per coloro che non si sono sottoposti al test: pensi che riusciresti a sottoposti al test per il coronavirus nel caso in cui ritenessi di averne bisogno oppure no?

- Sì  
 No  
 Non saprei

11. Per favore spiega i motivi per cui non pensi che riusciresti a sottoposti al test per il coronavirus nel caso in cui ritenessi di averne bisogno

\_\_\_\_\_

No translation provided

\_\_\_\_\_

12. Ritieni di avere attualmente - o di aver recentemente contratto - l'infezione da coronavirus?

- Sì  
 No  
 Non saprei

Per favore spiega i motivi per cui ritieni di avere attualmente - o di aver recentemente contratto - l'infezione da coronavirus

\_\_\_\_\_

13. Se esistesse un vaccino per impedire che le persone si ammalassero a causa del coronavirus, ti faresti vaccinare?

- Sì  
 No  
 Non saprei

Per favore spiega i motivi per cui ti faresti vaccinare se fosse disponibile un vaccino

\_\_\_\_\_

Per favore spiega i motivi per cui non ti faresti vaccinare se fosse disponibile un vaccino

\_\_\_\_\_

Per favore spiega i motivi per cui non sai se ti faresti vaccinare se fosse disponibile un vaccino

\_\_\_\_\_

14. Conosci personalmente qualcuno che ha contratto l'infezione da coronavirus (o COVID-19) spunta tutte le voci pertinenti

- Sì, un membro della mia famiglia  
 Sì, un amico  
 Sì, un vicino di casa  
 Sì, qualcun'altro  
 No  
 Non saprei

15. Conosci personalmente qualcuno che è deceduto per aver contratto l'infezione da coronavirus (o COVID-19) spunta tutte le voci pertinenti

- Sì, un membro della mia famiglia  
 Sì, un amico  
 Sì, un vicino di casa  
 Sì, qualcun'altro  
 No  
 Non saprei

*Confidential*

Page 28

---

16. Le persone parlano o spettegolano di coloro che hanno contratto l'infezione da coronavirus (o COVID-19), allo stato attuale o in precedenza, o di coloro che ritengono essere stati infettati?

- Decisamente sì
- Probabilmente sì
- Probabilmente no
- Decisamente no
- Non saprei

---

17. Le persone che hanno contratto l'infezione da coronavirus (o COVID-19) perdono il rispetto o la considerazione sociale nella loro comunità?

- Decisamente sì
- Probabilmente sì
- Probabilmente no
- Decisamente no
- Non saprei

Confidential

Page 29

**Sezione 5 - Domande sul nucleo familiare**

1. Hai un'automobile di proprietà  Sì  
 No  
 Preferisco non rispondere
2. Hai una casa di proprietà  Sì  
 No  
 Preferisco non rispondere
3. Sei il genitore o il tutore di un minore di età inferiore a 18 anni che vive nel tuo nucleo familiare?  Sì  
 No  
 Non saprei
4. La scuola o l'asilo di tuo figlio sono stati chiusi per alcuni periodi di tempo in conseguenza del coronavirus oppure no?  Sì  
 No  
 Non saprei
5. Se la scuola o l'asilo di tuo figlio sono stati/venissero chiusi per due settimane o più in conseguenza del coronavirus, quanto è stato/sarebbe difficile per te trovare un modo alternativo per occuparti dei bambini?  Molto difficile  
 Un poco difficile  
 Non molto difficile  
 Per nulla difficile
6. Se fossi costretto a restare a casa per la quarantena oppure perché le scuole o i posti di lavoro sono chiusi, potresti riuscire a svolgere, almeno in parte, il tuo lavoro da casa oppure no?  Sì  
 No  
 Non applicabile  
 Non saprei
6. Per favore spiega in quale modo potresti svolgere almeno una parte del tuo lavoro restando a casa \_\_\_\_\_
6. Per favore spiega come mai ti sarebbe impossibile svolgere almeno una parte del tuo lavoro restando a casa \_\_\_\_\_
7. Tu o uno dei membri del tuo nucleo familiare lavora in un ambiente che eroga assistenza sanitaria, per esempio uno studio medico, un ambulatorio, un ospedale, una casa di riposo o uno studio odontoiatrico? (spunta tutte le voci pertinenti)  Sì, io  
 Sì, un membro della mia famiglia  
 No, nessuno  
 Non saprei
8. Quante persone di età inferiore a 18 anni vivono attualmente nel tuo nucleo familiare? \_\_\_\_\_
9. Quanti adulti di età superiore a 18 anni vivono attualmente nel tuo nucleo familiare, compreso tu stesso? \_\_\_\_\_
10. Sei tu la persona che ha la responsabilità di occuparsi dei figli?  Sì  
 No  
 Non saprei

*Confidential*

Page 30

---

11. Hai la responsabilità di assistere persone anziane?

- Sì  
 No  
 Non saprei

---

12. Per favore, inserisci alcune informazioni relative alla tua rete di sostegno sociale (amici, familiari, vicini di casa):

---

Confidential

Page 31

**Sezione 6: Stress nell'ultimo mese**

|                                                                                                                                                                      | Mai                   | Quasi mai             | Talvolta              | Spesso                | Molto spesso          |
|----------------------------------------------------------------------------------------------------------------------------------------------------------------------|-----------------------|-----------------------|-----------------------|-----------------------|-----------------------|
| 1. Nell'ultimo mese, con quale frequenza sei rimasto turbato a causa di un evento inaspettato?                                                                       | <input type="radio"/> |
| 2. Nell'ultimo mese, con quale frequenza ti è sembrato di non riuscire a tenere sotto controllo gli aspetti importanti della tua vita?                               | <input type="radio"/> |
| 3. Nell'ultimo mese, con quale frequenza ti sei sentito nervoso e "stressato"?                                                                                       | <input type="radio"/> |
| 4. Nell'ultimo mese, con quale frequenza ti sei sentito sicuro nella gestione dei tuoi problemi personali?                                                           | <input type="radio"/> |
| 5. Nell'ultimo mese, con quale frequenza ti è sembrato che tutto andasse per il verso giusto?                                                                        | <input type="radio"/> |
| 6. Nell'ultimo mese, con quale frequenza ti è sembrato di non avere la forza di affrontare tutte le cose che avevi da fare?                                          | <input type="radio"/> |
| 7. Nell'ultimo mese, con quale frequenza sei riuscito a mantenere sotto controllo le seccature nella tua vita?                                                       | <input type="radio"/> |
| 8. Nell'ultimo mese, con quale frequenza ti è sembrato di avere il controllo della situazione?                                                                       | <input type="radio"/> |
| 9. Nell'ultimo mese, con quale frequenza ti sei arrabbiato a causa di eventi al di fuori del tuo controllo?                                                          | <input type="radio"/> |
| 10. Nell'ultimo mese, con quale frequenza ti è sembrato che le difficoltà si stessero accumulando a un livello tale da pensare che non saresti riuscito a superarle? | <input type="radio"/> |

11. Per favore, aggiungi ulteriori informazioni riguardo alle tue sensazioni di stress nel corso dell'ultimo mese

---

12/04/2020 9:13am

projectredcap.org



Confidential

Page 32

**Sezione 7: Sostegno sociale**

|                                                                                            | In assoluto disaccordo | Molto in disaccordo   | Poco d'accordo        | Indifferente          | Abbastanza d'accordo  | Molto d'accordo       | Estrema-mente d'accordo |
|--------------------------------------------------------------------------------------------|------------------------|-----------------------|-----------------------|-----------------------|-----------------------|-----------------------|-------------------------|
| 1. Posso contare su una persona speciale che è disponibile quando ho bisogno d'aiuto       | <input type="radio"/>  | <input type="radio"/> | <input type="radio"/> | <input type="radio"/> | <input type="radio"/> | <input type="radio"/> | <input type="radio"/>   |
| 2. Posso contare su una persona speciale con la quale condividere gioie e dolori.          | <input type="radio"/>  | <input type="radio"/> | <input type="radio"/> | <input type="radio"/> | <input type="radio"/> | <input type="radio"/> | <input type="radio"/>   |
| 3. La mia famiglia si adopera lealmente per darmi una mano.                                | <input type="radio"/>  | <input type="radio"/> | <input type="radio"/> | <input type="radio"/> | <input type="radio"/> | <input type="radio"/> | <input type="radio"/>   |
| 4. Traggo tutto il sostegno e l'aiuto emozionale di cui ho bisogno dalla mia famiglia.     | <input type="radio"/>  | <input type="radio"/> | <input type="radio"/> | <input type="radio"/> | <input type="radio"/> | <input type="radio"/> | <input type="radio"/>   |
| 5. Posso contare su una persona speciale che è per me una grande fonte di conforto.        | <input type="radio"/>  | <input type="radio"/> | <input type="radio"/> | <input type="radio"/> | <input type="radio"/> | <input type="radio"/> | <input type="radio"/>   |
| 6. I miei amici si adoperano lealmente per darmi una mano                                  | <input type="radio"/>  | <input type="radio"/> | <input type="radio"/> | <input type="radio"/> | <input type="radio"/> | <input type="radio"/> | <input type="radio"/>   |
| 7. Quando le cose vanno male posso contare sui miei amici.                                 | <input type="radio"/>  | <input type="radio"/> | <input type="radio"/> | <input type="radio"/> | <input type="radio"/> | <input type="radio"/> | <input type="radio"/>   |
| 8. Posso parlare liberamente dei miei problemi con la mia famiglia.                        | <input type="radio"/>  | <input type="radio"/> | <input type="radio"/> | <input type="radio"/> | <input type="radio"/> | <input type="radio"/> | <input type="radio"/>   |
| 9. Posso contare su alcuni amici con i quali condividere gioie e dolori.                   | <input type="radio"/>  | <input type="radio"/> | <input type="radio"/> | <input type="radio"/> | <input type="radio"/> | <input type="radio"/> | <input type="radio"/>   |
| 10. Nella mia vita posso contare su una persona speciale che ha a cuore i miei sentimenti. | <input type="radio"/>  | <input type="radio"/> | <input type="radio"/> | <input type="radio"/> | <input type="radio"/> | <input type="radio"/> | <input type="radio"/>   |
| 11. La mia famiglia è disposta ad aiutarmi a prendere decisioni.                           | <input type="radio"/>  | <input type="radio"/> | <input type="radio"/> | <input type="radio"/> | <input type="radio"/> | <input type="radio"/> | <input type="radio"/>   |
| 12. Posso parlare liberamente dei miei problemi con i miei amici.                          | <input type="radio"/>  | <input type="radio"/> | <input type="radio"/> | <input type="radio"/> | <input type="radio"/> | <input type="radio"/> | <input type="radio"/>   |



Confidential

Page 33

**Sezione 8 - Domande sulla salute**

1. In generale come definiresti la tua salute
- Eccellente  
 Molto buona  
 Buona  
 Discreta  
 Cagionevole
- 
2. Considerando ora la tua salute fisica, che comprende le malattie fisiche e le lesioni, per quanti giorni degli ultimi 30 non hai goduto di buona salute? \_\_\_\_\_  
((numero di giorni))
- 
3. Considerando ora la tua salute mentale, che comprende lo stress, la depressione e i problemi emozionali, per quanti giorni degli ultimi 30 non hai goduto di buona salute? \_\_\_\_\_  
((numero di giorni))
- 
4. All'incirca per quanti giorni degli ultimi 30 la cattiva salute fisica o mentale ti ha impedito di svolgere le tue abituali occupazioni, come prenderti cura di te stesso, lavorare o svolgere attività ricreative? \_\_\_\_\_  
((numero di giorni))
- 
5. Negli ultimi 12 mesi c'è stata un'occasione nella quale avresti avuto bisogno di assistenza sanitaria (per esempio un consulto medico) e non hai potuto permetterlo per il costo eccessivo?
- Sì  
 No  
 Non saprei
- 
6. Tu o uno dei membri del tuo nucleo familiare soffre di una patologia grave, per esempio pressione alta, cardiopatia, disturbi polmonari, cancro o diabete? (spunta tutte le voci pertinenti)
- Sì, io  
 Sì, un membro della mia famiglia  
 No, nessuno  
 Non saprei
- 
7. Quali delle seguenti voci è pertinente al tuo caso
- Sono attualmente in gravidanza  
 Il mio partner è attualmente in gravidanza  
 Né io né il mio partner siamo attualmente in gravidanza
- 
8. Desidereresti restare incinta o avere un bambino il prossimo anno?
- Sì  
 No  
 Non saprei

Confidential

Page 34

**Sezione 9: Social media****1. Quale delle seguenti piattaforme dei social media utilizzi? (Spunta la voce più pertinente per ciascuna)**

|              | Uso quotidiano        | Qualche volta alla settimana | Qualche volta al mese | Raramente             | Mai                   |
|--------------|-----------------------|------------------------------|-----------------------|-----------------------|-----------------------|
| a. Facebook  | <input type="radio"/> | <input type="radio"/>        | <input type="radio"/> | <input type="radio"/> | <input type="radio"/> |
| b. Twitter   | <input type="radio"/> | <input type="radio"/>        | <input type="radio"/> | <input type="radio"/> | <input type="radio"/> |
| c. LinkedIn  | <input type="radio"/> | <input type="radio"/>        | <input type="radio"/> | <input type="radio"/> | <input type="radio"/> |
| d. Instagram | <input type="radio"/> | <input type="radio"/>        | <input type="radio"/> | <input type="radio"/> | <input type="radio"/> |
| e. WhatsApp  | <input type="radio"/> | <input type="radio"/>        | <input type="radio"/> | <input type="radio"/> | <input type="radio"/> |
| f. Snapchat  | <input type="radio"/> | <input type="radio"/>        | <input type="radio"/> | <input type="radio"/> | <input type="radio"/> |
| g. Reddit    | <input type="radio"/> | <input type="radio"/>        | <input type="radio"/> | <input type="radio"/> | <input type="radio"/> |

2. Come è cambiato il tuo modo di usare i social media dall'inizio della pandemia di coronavirus?

- Uso molto di più i social media  
 Uso un poco di più i social media  
 Uso i social media più di prima  
 Non saprei

2b. Per favore spiega in quale maniera è cambiato il tuo modo di usare i social media dall'inizio della pandemia di coronavirus:

---

Confidential

Page 35

**Sezione 10 - Domande demografiche**

1. Quanti anni hai ad oggi?

---

2. Come descriveresti le tue origini etniche?

---

4. Ti consideri appartenente a uno dei seguenti gruppi? (spunta tutte le voci pertinenti)

- Messicano  
 Portoricano  
 Cubano

4a. Se ti consideri appartenente a un'altra etnia ispanica/latino-americana, diversa da quelle sopra elencate, per favore specificala:

---

4b. Non mi considero ispanico né latino-americano

- Vero  
 Falso

5. Quali delle seguenti voci descrive meglio il tuo grado di istruzione?

- Non ho finito la scuola superiore  
 Ho concluso la scuola superiore, il liceo, oppure conseguito il diploma da privatista (GED)  
 Ho frequentato il college/l'università ma non ho portato a termine gli studi  
 Ho conseguito la laurea in un college/università  
 Ho un diploma postlaurea del college/università (laurea magistrale, PhD, laurea in medicina e chirurgia, ecc.)

Confidential

Page 36

**6. Qual è la tua religione attuale? Spunta tutte le voci pertinenti**

|                               | Si                    | No                    | Preferisco non rispondere |
|-------------------------------|-----------------------|-----------------------|---------------------------|
| a. Cristiana                  | <input type="radio"/> | <input type="radio"/> | <input type="radio"/>     |
| b. Ebraica (giudaismo)        | <input type="radio"/> | <input type="radio"/> | <input type="radio"/>     |
| c. Musulmana                  | <input type="radio"/> | <input type="radio"/> | <input type="radio"/>     |
| d. Buddista                   | <input type="radio"/> | <input type="radio"/> | <input type="radio"/>     |
| e. Induista                   | <input type="radio"/> | <input type="radio"/> | <input type="radio"/>     |
| f. Ateista (non credo in Dio) | <input type="radio"/> | <input type="radio"/> | <input type="radio"/>     |
| g. Altro                      | <input type="radio"/> | <input type="radio"/> | <input type="radio"/>     |
| h. Non saprei                 | <input type="radio"/> | <input type="radio"/> | <input type="radio"/>     |

6g. Altra religione, per favore specifica

7. Se risiedi negli USA, per favore indica la razza/etnia alla quale appartieni (spunta tutte le voci pertinenti)

- Indiano americano o originario dell'Alaska
- Asiatico
- Americano di colore o afroamericano
- Nativo delle Hawaii
- Originario delle isole del Pacifico
- Caucasico
- Altro

7. Se hai selezionato altro, per favore specifica la razza/etnia

7. A quale delle seguenti categorie ritieni di appartenere?

Ai fini del presente studio ti preghiamo di fare riferimento alle seguenti definizioni.

- Udente/non sordo
- Duro d'orecchi
- sordo
- Sordo
- Sordocieco

Udente/non sordo: persona priva di disturbi dell'udito

Duro d'orecchi: persona con limitati disturbi dell'udito

sordo: persona non udente

Sordo: persona non udente che aderisce alla Cultura dei non udenti

Sordocieco: persona non udente affetta da parziale o totale cecità

9. Quale delle seguenti voci descrive meglio il genere a cui appartieni:

- Maschio
- Femmina
- Altra opzione

q9. Se hai spuntato la casella altra opzione per descrivere il tuo genere, per favore fornisci una spiegazione:

*Confidential*

Page 37

---

10. Ritieni di essere (spunta tutte le voci pertinenti)

- Eterosessuale
- Gay
- Lesbica
- Bisessuale
- Transgender
- Nessuna delle voci sopra elencate

---

10a. Se hai spuntato la casella nessuna delle voci sopra elencate, per favore specifica

---

*Confidential*

Page 38

**Sezione 11. Domanda conclusiva**

1. Per favore indica qualsiasi tua eventuale ulteriore riflessione riguardo al coronavirus e al COVID-19

---

Confidential

Page 39

**Sezione 12: Qualità del sondaggio**

**Desideriamo formulare alcune domande in merito al presente questionario per apportare miglioramenti in futuro. Se hai domande particolari che vorresti porre ti preghiamo di copiare e incollare la tua domanda nella casella di testo.**

1. In generale le domande del presente questionario erano "comprensibili". Ciò significa che non hai dovuto leggere le voci più di una volta per comprendere cosa veniva chiesto.

- Per niente d'accordo  
 Non sono d'accordo  
 Non sono d'accordo né in disaccordo  
 Sono d'accordo  
 Sono molto d'accordo

2. Hai trovato alcune specifiche domande particolarmente difficili da capire? In caso affermativo, per favore specifica (meglio che puoi)

\_\_\_\_\_

3. In generale il significato delle domande era chiaro e immediato

- Per niente d'accordo  
 Non sono d'accordo  
 Non sono d'accordo né in disaccordo  
 Sono d'accordo  
 Sono molto d'accordo

4. Hai trovato qualche domanda specifica il cui significato era poco chiaro? In caso affermativo, per favore specifica (meglio che puoi)

- Sì    No

4a. In caso affermativo, per favore specifica (meglio che puoi)

\_\_\_\_\_

5. Le scale utilizzate per graduare le risposte erano adeguate. Ciò significa che le scale proposte consentivano di rispondere in maniera appropriata.

- Per niente d'accordo  
 Non sono d'accordo  
 Non sono d'accordo né in disaccordo  
 Sono d'accordo  
 Sono molto d'accordo

6. A tuo parere, alcune delle risposte erano scritte in maniera tale da indurti a pensare che ci fosse UNA SOLA risposta OVVIA?

- Sì  
 No

6b. Per favore motiva la risposta

\_\_\_\_\_

Inserisci qualsiasi tuo eventuale ulteriore commento riguardo a questo studio

( ) \_\_\_\_\_

Per ulteriori informazioni sul coronavirus e sul COVID-19, per favore visita i seguenti siti

<http://www.governo.it/it/coronavirus>

<https://www.who.int/>

<https://www.cdc.gov/coronavirus/2019-ncov/index.html>

projectredcap.org

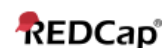

<https://www.cdc.gov/>
